# Supplementary material for: Novel glycosyl pyridyl-triazole@palladium nanoparticles: efficient and recoverable catalysts for C–C cross-coupling reactions
Source: Royal Society of Chemistry journal article supplement (doi:10.1039/c5cy00013k), 2015-01-01
Supplement: c5cy00013k1.pdf [file c5cy00013k1.pdf]

## Supporting Information

### **Novel glycosyl pyridyl-triazole@palladium nanoparticles: efficient and recoverable catalysts for C-C cross-couplings**

Hong-yun Shen,<sup>a</sup> Chao Shen,<sup>\*b</sup> Chao Chen,<sup>c</sup> An-ming Wang<sup>a</sup> and Peng-fei Zhang<sup>\*a</sup>

<sup>a</sup>College of Material, Chemistry and Chemical Engineering, Hangzhou Normal University, Hangzhou 310036, China

<sup>b</sup>College of Biology and Environmental Engineering, Zhejiang Shuren University, Hangzhou 310015, China

<sup>c</sup>College of Life sciences, Huzhou Teachers College, Huzhou, 313000, China

|                                                          |           |
|----------------------------------------------------------|-----------|
| <b>1. General Information.....</b>                       | <b>2</b>  |
| <b>2. Experimental Section.....</b>                      | <b>2</b>  |
| <b>3. Characterization of the Products:.....</b>         | <b>5</b>  |
| <b>4. Copies of NMR and GC-MS Spectra.....</b>           | <b>18</b> |
| <b>5. X-ray Crystal Data for GPT-Pd catalyst 5c.....</b> | <b>61</b> |
| <b>6. References.....</b>                                | <b>63</b> |

## 1. General Information

The starting materials were commercially available and were used without further purification except solvents. The products were isolated by column chromatography on silica gel (200-300 mesh) using petroleum ether (60-90°C) and ethyl acetate. Melting points were determined on an X-5 Data microscopic melting point apparatus. <sup>1</sup>H NMR and <sup>13</sup>C NMR spectra were recorded on a Bruker Advance 400 spectrometer at ambient temperature with CDCl<sub>3</sub> or DMSO-*d*<sub>6</sub> as solvent unless otherwise noted and tetramethylsilane (TMS) as the internal standard. Mass spectra (EI-MS) were acquired on an Agilent 5975 spectrometer. Mass spectra (GC-MS) were acquired on an Agilent 5975 spectrometer. Transmission electron microscopy (TEM) images were taken on FEI T20 microscope. ICP-AES metal determinations were carried out on a Perkin-Elmer Optima 3100 XL inductively coupled plasma atomic emission spectrometer equipped with an axial torch, segmented array charge-coupled device detector, and Babington-type nebulizer with cyclonic spray chamber for sample introduction. The small-angle X-ray diffraction (SAXRD) data were taken on a German Bruker D4 X-ray diffractometer with Niltered Cu Ka radiation (40 kV, 40 mA). Thermogravimetric analyses were performed with a SII Nano Technology EXTAR TG/DTA7220 thermal analyzer at 10 °C/min in nitrogen atmosphere (10 ml/min). 5 mg of each sample in an alumina pan was analyzed in the 40-900 °C temperature range. Analytical thin layer chromatography (TLC) was performed on Merk precoated TLC (silica gel 60 F254) plates. The sugar substrates were prepared according to our previous reports.<sup>1</sup> All compounds were characterized by <sup>1</sup>H NMR and mass spectroscopy, which are consistent with those reported in the literature.<sup>2-5</sup> The quinolone bromides was prepared according to a similar reference.<sup>6</sup>

## 2. Experimental Section

### General Procedure for synthesis of glycosyl pyridyl-triazole@palladium nanoparticle catalysts 5a-e

Synthesis of GPT-Pd catalyst **5c**: PdX<sub>2</sub> (X = OAc, Cl, Br) ( 0.50 mmol) was dissolved in anhydrous toluene (20.0 mL) and **4a-c** (0.60 mmol) was added. The solid-liquid mixture was stirred for 6 h at room temperature, during this course, the yellow precipitate slowly appeared and after which the solid was filtered, washed thoroughly with large volume of

acetone in order to remove any adsorbed palladium and finally dried at 30 °C under vacuum. The nanoparticle catalysts was obtained as light yellow powder.

**General procedure for Suzuki-Miyaura coupling reaction between aryl halides and arylboronic acids .**

The Suzuki reaction was performed in a 10 mL round-bottomed flask, aryl halide (1.0 mmol), arylboronic acid (1.5 mmol), GPT-Pd catalysts **5** (0.025 mol% respect to aryl halides), K<sub>2</sub>CO<sub>3</sub> (1.5 mmol) and water (3 mL) were charged and stirred at 80 to 100 °C under air. The reaction progress was monitored by TLC. After completion of the reaction, the mixture was allowed to cool to room temperature. Then the aqueous phase was extracted with CH<sub>2</sub>Cl<sub>2</sub> for 3 times (3 × 2 mL). Then the combined organic layers were dried over anhydrous Na<sub>2</sub>SO<sub>4</sub>, concentrated under vacuum and purified by column chromatography (n-hexane/ethyl acetate 10:1) to afford the desired product.

**General procedure for Heck reaction between aryl halides and olefins.**

The Heck reaction was performed in a 10 mL round-bottomed flask, aryl halide (0.5 mmol), olefins (0.6 mmol), GPT-Pd catalysts **5** (0.025 mol% respect to aryl halides), Et<sub>3</sub>N (1.5 mmol) and a mixture of water and DMSO (1:1, 3 mL) were charged and stirred at 80 to 100 °C under air. Monitoring of the reaction, workup procedure, and purification of the Heck-coupled products were performed as described for the Suzuki-Miyaura coupling reactions.

**General procedure for Sonogashira coupling reaction between aryl halides and terminal alkynes.**

The Sonogashira coupling reaction was performed in a 10 mL round-bottomed flask, aryl halide (1.0 mmol), terminal alkynes (1.5 mmol), GPT-Pd catalysts **5** (0.025 mol% respect to aryl halides), Et<sub>3</sub>N (1.5 mmol) and a mixture of water and DMSO (1:1, 3 mL) were charged and stirred at 80 to 100 °C under air. Monitoring of the reaction, workup procedure, and purification of the Sonogashira-coupled products were performed as described for the Suzuki-Miyaura coupling reactions.

### General procedure for the catalyst recycling experiment.

4-iodoanisole **6a** (1 mmol), phenylboronic acid **7a** (1.5 mmol), GPT-Pd catalyst **5c** (0.025 mol%), K<sub>2</sub>CO<sub>3</sub> (1.5 mmol) and in water (3 mL) was added to 3 mL water and ether was heated under air in an oil bath at 80 °C. After the completion of the reaction, the product was separated using ethyl acetate extraction and the catalyst by centrifugation (5000 rpm, 5 min). The products were purified by column chromatography. The catalyst was washed with ethyl acetate twice and was dried for 12 h at 50 °C. Then the separated catalyst was recharged with fresh substrate for the next run under the same reaction conditions.

### General procedure for the Hg poisoning experiments.<sup>7</sup>

4-iodoanisole **6a** (1 mmol), phenylboronic acid **7a** (1.5 mmol), GPT-Pd catalyst **5c** (0.025 mol%) and K<sub>2</sub>CO<sub>3</sub> (1.5 mmol) was added to 3 mL water and was heated under air in an oil bath at 80 °C. After 20 min, a mercury droplet was added to the reaction mixture. an immediate suppression of activity was noted, pointing to the heterogeneous nature of the present system.

**Table S1.** Mizoroki-Heck Reaction with GPT-Pd **5** in various solvents<sup>[a]</sup>

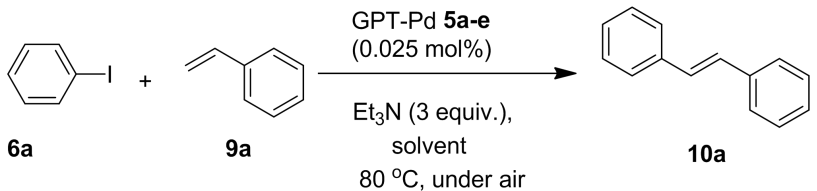

| entry | catalyst  | solvent                    | yield <sup>[b]</sup> (%) |
|-------|-----------|----------------------------|--------------------------|
| 1     | <b>5a</b> | H <sub>2</sub> O           | 53                       |
| 2     | <b>5b</b> | H <sub>2</sub> O           | 46                       |
| 3     | <b>5c</b> | H <sub>2</sub> O           | 60                       |
| 4     | <b>5d</b> | H <sub>2</sub> O           | 55                       |
| 5     | <b>5e</b> | H <sub>2</sub> O           | 32                       |
| 6     | <b>5c</b> | DMF                        | 92                       |
| 7     | <b>5c</b> | DMSO                       | 96                       |
| 8     | <b>5c</b> | DMSO-H <sub>2</sub> O(1:2) | 91                       |
| 9     | <b>5c</b> | DMSO-H <sub>2</sub> O(1:1) | 95                       |

|    |           |                            |    |
|----|-----------|----------------------------|----|
| 10 | <b>5c</b> | DMSO-H <sub>2</sub> O(3:1) | 95 |
|----|-----------|----------------------------|----|

[<sup>a</sup>] Reaction conditions: **6a** (0.5 mmol), **9a** (0.6 mmol), Et<sub>3</sub>N (1.5 mmol), 0.025 mol% of **5a-e**, 3 mL of solvent at 80 °C under air. [<sup>b</sup>] Yields of isolated products are the average of at least two experiments.

**Table S2.** Sonogashira reaction with GPT-Pd **5c** and **5d**.<sup>[a]</sup>

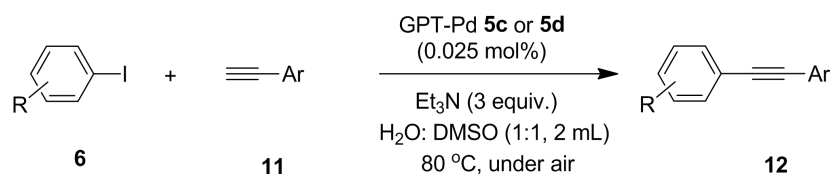

| Entry | Catalyst  | R                  | Ar       | Yield <sup>[b]</sup> (%) |
|-------|-----------|--------------------|----------|--------------------------|
| 1     | <b>5c</b> | 4-CH <sub>3</sub>  | Ph       | 93( <b>12a</b> )         |
| 2     | <b>5d</b> | 4-CH <sub>3</sub>  | Ph       | 88( <b>12a</b> )         |
| 3     | <b>5c</b> | 4-OCH <sub>3</sub> | Ph       | 95( <b>12b</b> )         |
| 4     | <b>5d</b> | 4-OCH <sub>3</sub> | Ph       | 92( <b>12b</b> )         |
| 5     | <b>5c</b> | 4-Cl               | Ph       | 87( <b>12c</b> )         |
| 6     | <b>5d</b> | 4-Cl               | Ph       | 83( <b>12c</b> )         |
| 7     | <b>5c</b> | 4-NO <sub>2</sub>  | Ph       | 95( <b>12d</b> )         |
| 8     | <b>5d</b> | 4-NO <sub>2</sub>  | Ph       | 89( <b>12d</b> )         |
| 9     | <b>5c</b> | 3-NO <sub>2</sub>  | Ph       | 96( <b>12e</b> )         |
| 10    | <b>5d</b> | 3-NO <sub>2</sub>  | Ph       | 91( <b>12e</b> )         |
| 11    | <b>5c</b> | H                  | pyridine | 92( <b>12f</b> )         |
| 12    | <b>5d</b> | H                  | pyridine | 90( <b>12f</b> )         |

[<sup>a</sup>]Reaction conditions: aryl iodides **6** (0.5 mmol), terminal alkynes **11** (0.75 mmol), 0.025 mol% of **5c** and **5d**, Et<sub>3</sub>N (1.5 mmol), 3 mL of H<sub>2</sub>O: DMSO (1:1) at 80 °C under air. [<sup>b</sup>]Isolated yield.

### 3. Characterization of the Products:

#### 4-Pyridyl-1-(2,3,4,6-tetra-*O*-acetyl-1-*D*-glucopyranosyl)-1,2,3-triazole **4a**<sup>1</sup>:

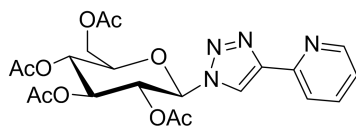

white solid, 93% yield, mp. 214-218°C. <sup>1</sup>H NMR (500 MHz,

DMSO): δ 9.00 (s, 1H), 8.64 (d, *J* = 4 Hz, 1H), 8.05 (d, *J* = 8 Hz, 1H), 7.93 (td, *J* = 7.8,

1.5 Hz, 1H), 7.39 (dd,  $J = 6.9, 5.3$  Hz, 1H), 6.44 (d,  $J = 9.2$  Hz, 1H), 5.80 (t,  $J = 9.4$  Hz, 1H), 5.62 (t,  $J = 9.5$  Hz, 1H), 5.25 (t,  $J = 9.8$  Hz, 1H), 4.41 (ddd,  $J = 10.0, 5.5, 2.4$  Hz, 1H), 4.13 (qd,  $J = 12.5, 3.9$  Hz, 2H), 2.05 (s, 3H), 2.01 (s, 3H), 1.99 (s, 3H), 1.82 (s, 3H).  $^{13}\text{C}$  NMR (126 MHz, DMSO):  $\delta$  170.55, 170.08, 169.90, 169.14, 150.24, 149.73, 148.31, 137.82, 123.87, 122.76, 120.10, 84.52, 73.70, 72.45, 70.66, 67.95, 62.35, 20.99, 20.89, 20.74, 20.40.

**4-Pyridyl-1-(2,3,4,6-tetra-*O*-pivaloyl-1-*D*-glucopyranosyl)-1,2,3-triazole 4b:**

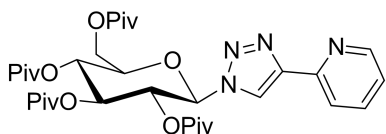

white solid, 95% yield, mp. 227-231°C.  $^1\text{H}$  NMR (500 MHz, DMSO):  $\delta$  9.02 (s, 1H), 8.64 (d,  $J = 4.3$  Hz, 1H), 8.02 (d,  $J = 7.8$  Hz, 1H), 7.92 (d,  $J = 7.4$  Hz, 1H), 7.48 – 7.22 (m, 1H), 6.46 (d,  $J = 9.2$  Hz, 1H), 5.83 (t,  $J = 9.3$  Hz, 1H), 5.68 (t,  $J = 9.5$  Hz, 1H), 5.36 (t,  $J = 9.8$  Hz, 1H), 4.50 (d,  $J = 10.0$  Hz, 1H), 4.14 (d,  $J = 2.0$  Hz, 2H), 1.15 (s, 8H), 1.13 (s, 9H), 1.07 (s, 9H), 0.84 (s, 9H).  $^{13}\text{C}$  NMR (126 MHz, DMSO):  $\delta$  177.52, 176.85, 176.21, 176.01, 150.23, 148.29, 137.75, 123.79, 122.87, 120.14, 84.92, 74.20, 72.52, 70.71, 67.38, 61.67, 38.79, 38.76, 38.71, 38.56, 27.23, 27.11, 26.77.

**GPT-Pd catalyst 5a:**

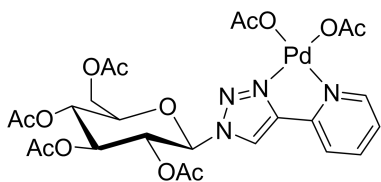

yellow solid 90% yield,  $^1\text{H}$  NMR (500 MHz, DMSO):  $\delta$  9.57 (s, 1H), 8.33 (td,  $J = 7.8, 1.1$  Hz, 1H), 8.20 (d,  $J = 7.6$  Hz, 1H), 8.09 (d,  $J = 5.5$  Hz, 1H), 7.72 – 7.67 (m, 1H), 6.64 – 6.61 (m, 1H), 5.66 – 5.61 (m, 1H), 5.57 (t,  $J = 9.2$  Hz, 1H), 5.23 (dd,  $J = 13.1, 6.4$  Hz, 1H), 4.45 (ddd,  $J = 10.0, 5.6, 2.2$  Hz, 2H), 4.21 (dd,  $J = 12.6, 5.6$  Hz, 1H), 4.13 (d,  $J = 12.4$  Hz, 2H), 2.05 (s, 3H), 2.03 (s, 3H), 2.00 (s, 3H), 1.95 (s, 3H), 1.92 (s, 3H), 1.83 (s, 3H).  $^{13}\text{C}$  NMR (126 MHz, DMSO):  $\delta$  176.10, 175.95, 170.47, 169.94, 169.82, 169.53, 149.95, 148.01, 147.71, 141.91, 126.62, 124.68, 122.78, 85.98, 74.32, 71.97, 70.75, 67.78, 62.15, 40.58, 40.41, 40.25, 40.08, 39.91, 39.75, 39.58,

23.77, 23.29, 20.96, 20.82, 20.68, 20.41. Anal. calcd. for C<sub>25</sub>H<sub>30</sub>N<sub>4</sub>O<sub>13</sub>Pd: C, 42.84; H, 4.31; N, 7.99; found: C, 42.80; H, 4.41; N, 7.82.

GPT-Pd catalyst **5b**:

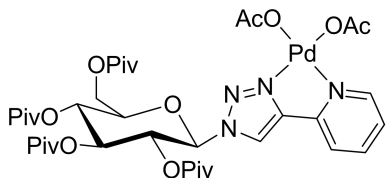

yellow solid 92% yield, <sup>1</sup>H NMR (500 MHz, DMSO): δ

9.63 (s, 1H), 8.33 (s, 1H), 8.18 (d, *J* = 7.8 Hz, 1H), 8.10 (d, *J* = 5.6 Hz, 1H), 7.70 (s, 1H), 6.63 (d, *J* = 9.0 Hz, 1H), 5.72 (t, *J* = 9.6 Hz, 1H), 5.55 (d, *J* = 9.2 Hz, 1H), 5.34 (d, *J* = 9.9 Hz, 1H), 4.58 (s, 1H), 4.18 (d, *J* = 3.5 Hz, 3H), 1.92 (s, 3H), 1.81 (s, 3H), 1.17 (d, *J* = 2.5 Hz, 11H), 1.12 (s, 11H), 1.07 (s, 11H), 0.99 (d, *J* = 5.1 Hz, 11H). <sup>13</sup>C NMR (126 MHz, DMSO): δ 177.53, 176.86, 176.20, 176.02, 150.25, 149.80, 148.30, 137.78, 123.82, 122.86, 120.14, 84.89, 74.15, 72.49, 70.68, 67.31, 61.65, 27.23, 27.11, 26.77. Anal. calcd. for C<sub>37</sub>H<sub>54</sub>N<sub>4</sub>O<sub>13</sub>Pd: C, 51.12; H, 6.26; N, 6.45; found: C, 51.18; H, 6.20; N, 6.451.

GPT-Pd catalyst **5c**:

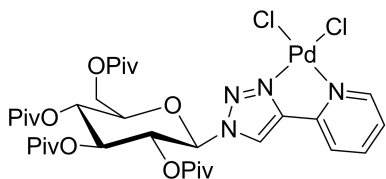

yellow solid 97% yield, <sup>1</sup>H NMR (500 MHz, DMSO): δ

9.69 (s, 1H), 9.01 (d, *J* = 5.4 Hz, 1H), 8.34 (d, *J* = 1.1 Hz, 1H), 8.18 (d, *J* = 7.7 Hz, 1H), 7.76 (s, 1H), 6.66 (d, *J* = 9.0 Hz, 1H), 5.76 (t, *J* = 9.5 Hz, 1H), 5.55 (s, 1H), 5.34 (t, *J* = 9.8 Hz, 1H), 4.61 (s, 1H), 4.19 (d, *J* = 2.7 Hz, 2H), 1.18 (s, 9H), 1.13 (s, 10H), 1.07 (s, 10H), 0.98 (s, 9H). <sup>13</sup>C NMR (126 MHz, DMSO): δ 177.50, 176.79, 176.48, 176.16, 151.33, 149.25, 148.10, 142.06, 126.87, 124.82, 123.00, 86.36, 74.58, 71.80, 71.07, 67.09, 61.66, 27.27, 27.19, 27.09, 27.04. Anal. calcd. for C<sub>33</sub>H<sub>48</sub>Cl<sub>2</sub>N<sub>4</sub>O<sub>9</sub>Pd: C, 48.21; H, 5.89; N, 6.82; found: C, 48.13; H, 5.77; N, 6.80.

GPT-Pd catalyst **5d**:

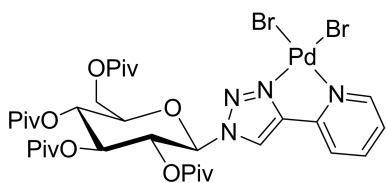

yellow solid 81% yield.  $^1\text{H}$  NMR (500 MHz, DMSO):  $\delta$

9.70 (s, 1H), 9.24 (s, 1H), 8.35 (t,  $J = 7.3$  Hz, 1H), 8.18 (d,  $J = 7.4$  Hz, 1H), 7.76 (s, 1H), 6.67 (d,  $J = 8.8$  Hz, 1H), 5.75 (t,  $J = 9.3$  Hz, 1H), 5.56 (t,  $J = 9.0$  Hz, 1H), 5.35 (t,  $J = 9.7$  Hz, 1H), 4.60 (d,  $J = 9.6$  Hz, 1H), 4.19 (s, 2H), 1.18 (s, 9H), 1.13 (s, 9H), 1.07 (s, 9H), 0.98 (s, 9H).  $^{13}\text{C}$  NMR (126 MHz, DMSO):  $\delta$  177.50, 176.79, 176.48, 176.16, 151.33, 149.25, 148.10, 142.06, 126.87, 124.82, 123.00, 86.36, 74.58, 71.80, 71.07, 67.09, 61.66, 27.27, 27.19, 27.09, 27.04. Anal. calcd. for  $\text{C}_{33}\text{H}_{48}\text{Br}_2\text{N}_4\text{O}_9\text{Pd}$ : C, 43.51; H, 5.31; N, 6.15; found: C, 43.56; H, 5.27; N, 6.07.

GPT-Pd catalyst **5e**:

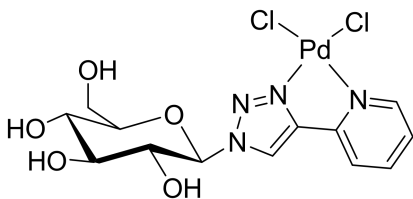

yellow solid 78% yield.  $^1\text{H}$  NMR (500 MHz, DMSO):  $\delta$

9.54 (s, 1H), 9.02 (d,  $J = 5.6$  Hz, 1H), 8.34 (t,  $J = 7.7$  Hz, 1H), 8.19 (d,  $J = 7.7$  Hz, 1H), 7.74 (t,  $J = 6.6$  Hz, 1H), 5.84 (d,  $J = 9.2$  Hz, 1H), 5.66 (d,  $J = 5.6$  Hz, 1H), 5.40 (d,  $J = 5.1$  Hz, 1H), 5.24 (d,  $J = 5.5$  Hz, 1H), 4.68 (t,  $J = 5.7$  Hz, 1H), 3.73 (ddd,  $J = 15.0, 10.0, 5.9$  Hz, 2H), 3.64 – 3.57 (m, 1H), 3.56 – 3.44 (m, 3H).  $^{13}\text{C}$  NMR (126 MHz, DMSO):  $\delta$  150.27, 148.47, 141.92, 126.18, 125.19, 122.54, 89.75, 80.71, 76.64, 73.16, 69.69, 61.08, 60.55. Anal. calcd. for  $\text{C}_{13}\text{H}_{16}\text{Cl}_2\text{N}_4\text{O}_5\text{Pd}$ : C, 32.15; H, 3.32; N, 11.54; found: C, 32.19; H, 3.28; N, 11.48.

**Products of Suzuki-Miyaura reactions:<sup>3</sup>**

**4-methoxybiphenyl 8a:**

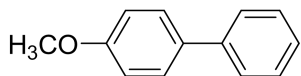

$^1\text{H}$  NMR (500 MHz,  $\text{CDCl}_3$ ):  $\delta$  7.60 (dd,  $J = 11.4, 8.2$  Hz, 4H), 7.47 (t,  $J = 7.7$  Hz, 2H), 7.36 (t,  $J = 7.4$  Hz, 1H), 7.03 (d,  $J = 8.7$  Hz, 2H), 3.90 (s, 3H). GC-MS (EI)  $[\text{M}]^+$ :  $m/z$  calcd. for  $\text{C}_{13}\text{H}_{12}\text{O}$ : 184.0, found: 184.



**4-methylbiphenyl 8b:**

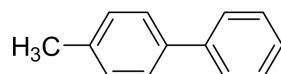  $^1\text{H NMR}$  (500 MHz,  $\text{CDCl}_3$ ):  $\delta$  7.69 (dt,  $J = 8.2, 4.2$  Hz, 2H), 7.59 (d,  $J = 8.1$  Hz, 1H), 7.54 (q,  $J = 7.9$  Hz, 2H), 7.37 – 7.31 (m, 1H), 7.34 (d,  $J = 7.9$  Hz, 2H), 2.48 (s, 3H). GC-MS (EI)  $[\text{M}]^+$ :  $m/z$  calcd. for  $\text{C}_{13}\text{H}_{12}$ : 168.0, found: 168.

**4-chlorobiphenyl 8c:**

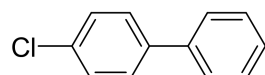  $^1\text{H NMR}$  (500 MHz,  $\text{CDCl}_3$ ):  $\delta$  7.59 – 7.50 (m, 4H), 7.42 (m,  $J = 10.9, 8.5, 4.6$  Hz, 4H), 7.35 (t,  $J = 7.4$  Hz, 1H). GC-MS (EI)  $[\text{M}]^+$ :  $m/z$  calcd. For  $\text{C}_{12}\text{H}_9\text{Cl}$ : 188.0, found: 188.

**biphenyl-4-ol 8d:**

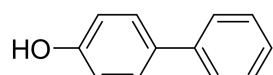  $^1\text{H NMR}$  (500 MHz, DMSO):  $\delta$  9.51 (s, 1H), 7.58 (dd,  $J = 8.2, 1.1$  Hz, 2H), 7.52 – 7.47 (m, 2H), 7.41 (t,  $J = 7.7$  Hz, 2H), 7.28 (t,  $J = 7.4$  Hz, 1H). GC-MS (EI)  $[\text{M}]^+$ :  $m/z$  calcd. for  $\text{C}_{12}\text{H}_{10}\text{O}$ : 170.0, found: 170.

**4-nitrobiphenyl 8e:**

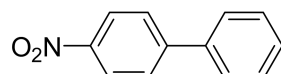  $^1\text{H NMR}$  (500 MHz,  $\text{CDCl}_3$ ):  $\delta$  8.39 – 8.34 (m, 1H), 7.83 – 7.78 (m, 1H), 7.70 (dd,  $J = 5.3, 3.3$  Hz, 1H), 7.60 – 7.54 (m, 0.5H), 7.52 (dt,  $J = 9.6, 4.3$  Hz, 0.5H). GC-MS (EI)  $[\text{M}]^+$ :  $m/z$  calcd. for  $\text{C}_{12}\text{H}_9\text{NO}_2$ : 199.0, found: 199.

**4-(trifluoromethyl)biphenyl 8f:**

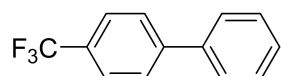  $^1\text{H NMR}$  (500 MHz,  $\text{CDCl}_3$ ):  $\delta$  7.73 (s, 1H), 7.65 (dd,  $J = 8.2, 1.0$  Hz, 3H), 7.56 – 7.44 (m, 3H), 7.42 – 7.38 (m, 1H). GC-MS (EI)  $[\text{M}]^+$ :  $m/z$  calcd. for  $\text{C}_{13}\text{H}_9\text{F}_3$ : 222.0, found: 222.

**1,1':4',1''-Terphenyl 8g:**

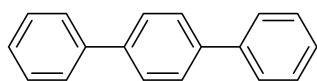

$^1\text{H NMR}$  (500 MHz,  $\text{CDCl}_3$ ):  $\delta$  7.71 (s, 4H), 7.69 – 7.68 (m, 4H), 7.46 (t,  $J = 7.7$  Hz, 4H), 7.36 (t,  $J = 7.4$  Hz, 2H). GC-MS (EI)  $[\text{M}]^+$ :  $m/z$  calcd. for  $\text{C}_{14}\text{H}_{12}\text{O}$ : 196.0, found: 196.

**biphenyl 8h:**

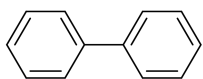

$^1\text{H NMR}$  (500 MHz,  $\text{CDCl}_3$ ):  $\delta$  7.74 – 7.71 (m, 4H), 7.56 (dd,  $J = 10.5$ , 4.8 Hz, 4H), 7.48 – 7.46 (m, 2H). GC-MS (EI)  $[\text{M}]^+$ :  $m/z$  calcd. for  $\text{C}_{12}\text{H}_{10}$ : 154.0, found: 154.

**3-nitrobiphenyl 8i:**

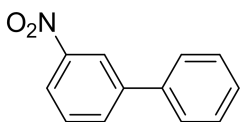

$^1\text{H NMR}$  (500 MHz,  $\text{CDCl}_3$ ):  $\delta$  8.48 (t,  $J = 1.9$  Hz, 1H), 8.22 (dd,  $J = 8.2$ , 1.4 Hz, 1H), 7.94 (d,  $J = 7.8$  Hz, 1H), 7.65 (dt,  $J = 13.9$ , 4.7 Hz, 3H), 7.53 (dd,  $J = 10.3$ , 4.8 Hz, 2H), 7.50 – 7.44 (m, 1H). GC-MS (EI)  $[\text{M}]^+$ :  $m/z$  calcd. for  $\text{C}_{12}\text{H}_9\text{NO}_2$ : 199.0, found: 199.

**2-methylbiphenyl 8j:**

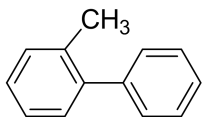

$^1\text{H NMR}$  (500 MHz,  $\text{CDCl}_3$ ):  $\delta$  7.60 (dd,  $J = 8.2$ , 1.1 Hz, 1H), 7.46 – 7.38 (m, 3H), 7.37 – 7.31 (m, 3H), 7.29 – 7.22 (m, 2H), 2.27 (s, 3H). GC-MS (EI)  $[\text{M}]^+$ :  $m/z$  calcd. for  $\text{C}_{13}\text{H}_{12}$ : 168.0, found: 168.

**4-methoxy-4'-(trifluoromethoxy)biphenyl 8k:**

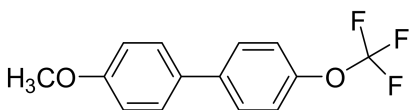

$^1\text{H NMR}$  (500 MHz,  $\text{CDCl}_3$ ):  $\delta$  7.68 (dd,  $J = 9.1$ , 2.4 Hz, 2H), 7.29 – 7.27 (m, 2H), 7.02 – 7.00 (m, 2H), 3.88 (s, 3H). GC-MS (EI)  $[\text{M}]^+$ :  $m/z$  calcd. for  $\text{C}_{14}\text{H}_{11}\text{F}_3\text{O}_2$ : 268.0, found: 268.

**4,4'-dimethoxybiphenyl 8l:**

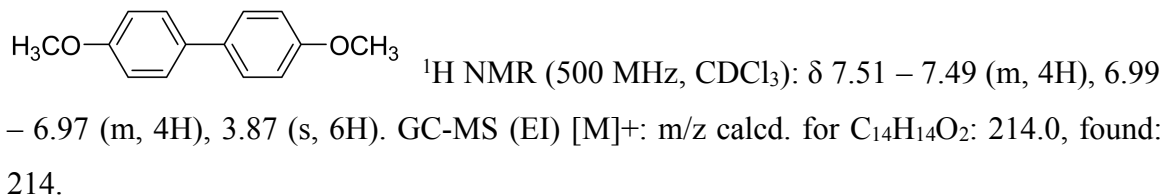

**4-methoxy-4'-methylbiphenyl 8m:**

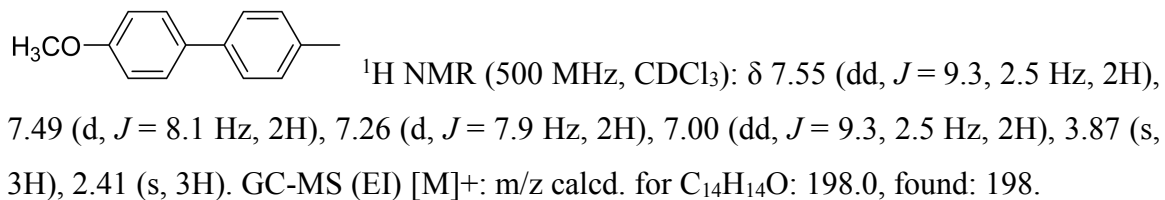

**2,4'-dimethoxybiphenyl 8n:**

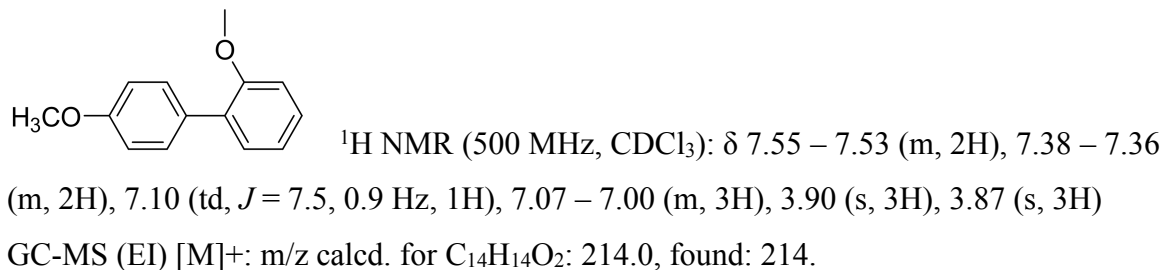

**14-fluoro-4'-methoxybiphenyl 8o:**

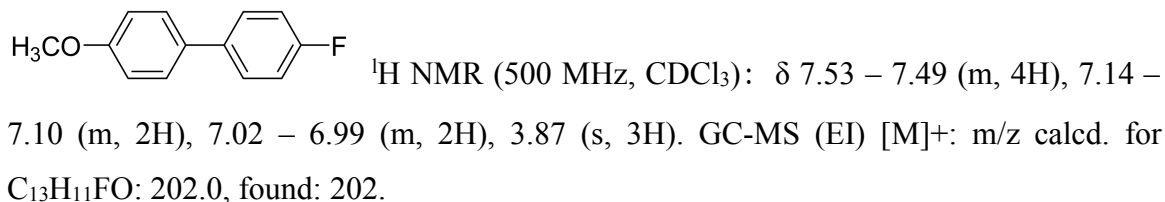

**4-tert-butyl-4'-methoxybiphenyl 8p:**

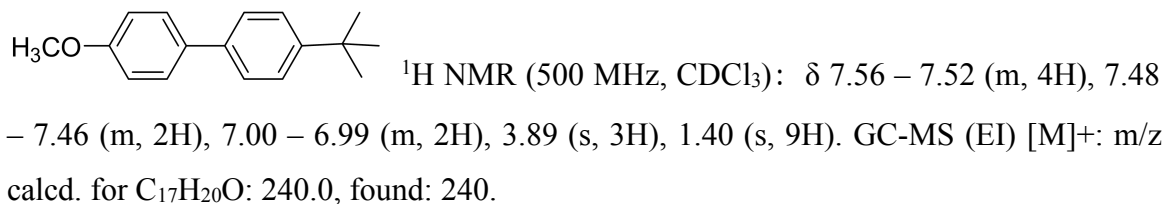

**4'-methoxybiphenyl-4-ol 8q:**

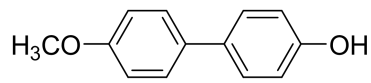  $^1\text{H NMR}$  (500 MHz,  $\text{CDCl}_3$ ):  $\delta$  7.49 – 7.48 (m, 2H), 7.46 – 7.44 (m, 2H), 6.99 – 6.97 (m, 2H), 6.91 – 6.89 (m, 2H), 3.87 (s, 3H). GC-MS (EI)  $[\text{M}]^+$ :  $m/z$  calcd. for  $\text{C}_{13}\text{H}_{12}\text{O}_2$ : 200.0, found: 200.

**4'-methoxy-3-methylbiphenyl-4-amine 8r:**

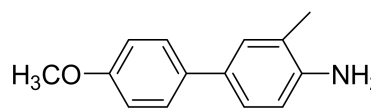  $^1\text{H NMR}$  (500 MHz,  $\text{CDCl}_3$ ):  $\delta$  7.41 – 7.39 (m, 2H), 7.00 (dd,  $J = 6.7, 2.1$  Hz, 4H), 6.79 (d,  $J = 7.9$  Hz, 1H), 4.01 (dd,  $J = 61.2, 43.2$  Hz, 2H), 3.90 – 3.83 (m, 3H), 2.32 (s, 3H). GC-MS (EI)  $[\text{M}]^+$ :  $m/z$  calcd. for  $\text{C}_{14}\text{H}_{12}\text{O}$ : 196.0, found: 196

**2-(4-methoxyphenyl)thiophene 8s:**

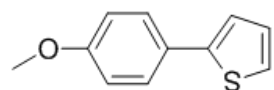  $^1\text{H NMR}$  (500 MHz,  $\text{CDCl}_3$ ):  $\delta$  7.57 – 7.55 (m, 2H), 7.24 – 7.22 (m, 2H), 7.15 (dd,  $J = 5.1, 3.6$  Hz, 1H), 7.05 – 7.00 (m, 2H), 3.86 (s, 3H). GC-MS (EI)  $[\text{M}]^+$ :  $m/z$  calcd. for  $\text{C}_{11}\text{H}_{10}\text{OS}$ : 190.0, found: 190.

**1-(4'-fluorobiphenyl-4-yl)ethanone 8t:**

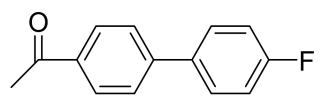  $^1\text{H NMR}$  (500 MHz,  $\text{CDCl}_3$ ):  $\delta$  8.05 – 8.04 (m, 2H), 7.67 – 7.60 (m, 2H), 7.29 (2H), 7.20 – 7.19 (m, 2H), 2.66 (s, 3H). GC-MS (EI)  $[\text{M}]^+$ :  $m/z$  calcd. for  $\text{C}_{14}\text{H}_{12}\text{O}$ : 196.0, found: 196

**4'-tert-butyl-2-nitrobiphenyl 8u:**

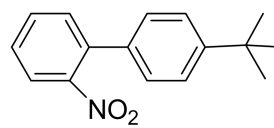  $^1\text{H NMR}$  (500 MHz,  $\text{CDCl}_3$ ):  $\delta$  8.55 (t,  $J = 1.9$  Hz, 1H), 8.30 – 8.25 (m, 1H), 8.02 – 7.99 (m, 1H), 7.71 – 7.66 (m, 3H), 7.64 – 7.60 (m, 2H), 1.48 (s, 9H).

GC-MS (EI) [M]<sup>+</sup>: m/z calcd. for C<sub>14</sub>H<sub>12</sub>O: 196.0, found: 196.

**4'-methoxybiphenyl-2-amine 8v:**

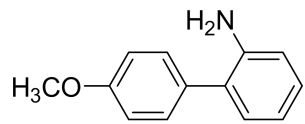 <sup>1</sup>H NMR (500 MHz, CDCl<sub>3</sub>): δ 7.42 (dd, *J* = 6.7, 4.8 Hz, 2H), 7.23 – 7.16 (m, 2H), 7.01 – 6.91 (m, 4H), 5.04 (br, 2H), 3.84 (d, *J* = 4.3 Hz, 3H). GC-MS (EI) [M]<sup>+</sup>: m/z calcd. for C<sub>13</sub>H<sub>13</sub>NO: 199.0, found: 199.

**2-(4-fluorophenyl)thiophene 8w:**

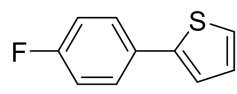 <sup>1</sup>H NMR (500 MHz, CDCl<sub>3</sub>): δ 7.65 – 7.58 (m, 2H), 7.31 (dd, *J* = 5.1, 1.0 Hz, 1H), 7.28 – 7.27 (m, 1H), 7.17 – 7.03 (m, 3H). <sup>13</sup>C NMR (126 MHz, CDCl<sub>3</sub>): δ 163.33, 161.37, 143.30, 130.63, 127.97, 127.67, 124.64, 122.97, 115.74, 115.61.

**Products of Mizoroki-Heck reaction reactions:<sup>4</sup>**

**(*E*)-1,2-diphenylethene 10a:**

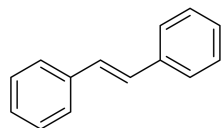 <sup>1</sup>H NMR (500 MHz, CDCl<sub>3</sub>): δ 7.58 (d, *J* = 7.5 Hz, 4H), 7.43 (dd, *J* = 9.8, 5.5 Hz, 4H), 7.36 – 7.29 (m, 2H), 7.18 (d, *J* = 1.3 Hz, 2H). GC-MS (EI) [M]<sup>+</sup>: m/z calcd. for C<sub>14</sub>H<sub>12</sub>: 180.0, found: 180.

**(*E*)-1-methyl-4-styrylbenzene 10b:**

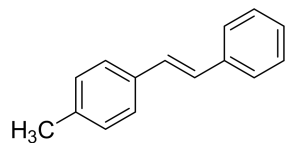 <sup>1</sup>H NMR (500 MHz, CDCl<sub>3</sub>): δ 7.60 – 7.54 (m, 2H), 7.51 – 7.45 (m, 2H), 7.45 – 7.38 (m, 2H), 7.32 (dd, *J* = 8.3, 5.4 Hz, 1H), 7.26 – 7.20 (m, 2H), 7.17 – 7.11 (m, 2H), 2.49 – 2.37 (m, 3H). GC-MS (EI) [M]<sup>+</sup>: m/z calcd. for C<sub>15</sub>H<sub>14</sub>: 194.0, found: 194.

**(*E*)-1-nitro-4-styrylbenzene 10c:**

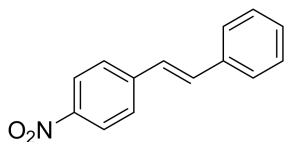

$^1\text{H NMR}$  (500 MHz,  $\text{CDCl}_3$ ):  $\delta$  8.24 (d,  $J = 8.8$  Hz, 2H), 7.65 (d,  $J = 8.7$  Hz, 2H), 7.58 (d,  $J = 7.3$  Hz, 2H), 7.43 (t,  $J = 7.5$  Hz, 2H), 7.39 – 7.34 (m, 1H), 7.29 (t,  $J = 4.4$  Hz, 1H), 7.17 (d,  $J = 16.3$  Hz, 1H). GC-MS (EI)  $[\text{M}]^+$ :  $m/z$  calcd. for  $\text{C}_{14}\text{H}_{11}\text{NO}_2$ : 225.0, found: 225.

**(E)-1-chloro-4-styrylbenzene 10d:**

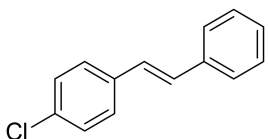

$^1\text{H NMR}$  (500 MHz,  $\text{CDCl}_3$ ):  $\delta$  7.55 (d,  $J = 7.4$  Hz, 2H), 7.46 (t,  $J = 9.4$  Hz, 2H), 7.41 (t,  $J = 7.6$  Hz, 2H), 7.37 (d,  $J = 8.5$  Hz, 2H), 7.33 (t,  $J = 7.3$  Hz, 1H), 7.15 – 7.06 (m, 2H). GC-MS (EI)  $[\text{M}]^+$ :  $m/z$  calcd. for  $\text{C}_{14}\text{H}_{11}\text{Cl}$ : 214.0, found: 214.

**(E)-4-styrylphenol 10e:**

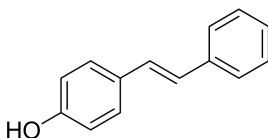

$^1\text{H NMR}$  (500 MHz, DMSO):  $\delta$  9.55 (d,  $J = 12.0$  Hz, 1H), 7.54 (d,  $J = 7.3$  Hz, 2H), 7.46 – 7.38 (m, 2H), 7.35 (t,  $J = 7.7$  Hz, 2H), 7.26 – 7.18 (m, 1H), 7.18 – 7.09 (m, 1H), 7.02 (d,  $J = 16.4$  Hz, 1H), 6.83 – 6.72 (m, 2H). GC-MS (EI)  $[\text{M}]^+$ :  $m/z$  calcd. for  $\text{C}_{14}\text{H}_{12}\text{O}$ : 196.0, found: 196.

**(E)-1-methoxy-4-styrylbenzene 10f:**

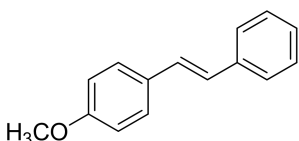

$^1\text{H NMR}$  (500 MHz,  $\text{CDCl}_3$ ):  $\delta$  7.50 – 7.40 (m, 4H), 7.33 (dd,  $J = 10.6, 4.7$  Hz, 2H), 7.21 (t,  $J = 3.7$  Hz, 1H), 7.05 (d,  $J = 16.3$  Hz, 1H), 6.96 (d,  $J = 16.3$  Hz, 1H), 6.90 – 6.85 (m, 2H), 3.80 (s, 3H). GC-MS (EI)  $[\text{M}]^+$ :  $m/z$  calcd. for  $\text{C}_{15}\text{H}_{14}\text{O}$ : 210.0, found: 210.

**Methyl cinnamate 10g:**

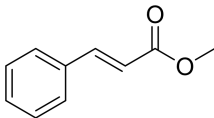

$^1\text{H NMR}$  (500 MHz,  $\text{CDCl}_3$ ):  $\delta$  7.72 (d,  $J = 16.0$  Hz, 1H), 7.57 – 7.49 (m, 2H), 7.44 – 7.35 (m, 3H), 6.47 (d,  $J = 16.0$  Hz, 1H), 3.83 (s, 3H). GC-MS (EI)  $[\text{M}]^+$ :  $m/z$  calcd. for  $\text{C}_{10}\text{H}_{10}\text{O}_2$ : 162.0, found: 162.

### Products of Sonogashira reaction reactions:<sup>5</sup>

#### 1-methyl-4-(phenylethynyl)benzene 12a:

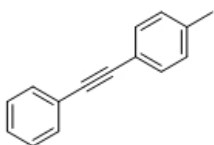

$^1\text{H NMR}$  (500 MHz,  $\text{CDCl}_3$ ):  $\delta$  7.58 (dd,  $J = 7.8, 1.7$  Hz, 2H), 7.48 (d,  $J = 8.1$  Hz, 2H), 7.38 (dd,  $J = 5.6, 3.8$  Hz, 3H), 7.20 (d,  $J = 7.9$  Hz, 2H), 2.42 (s, 3H). GC-MS (EI)  $[\text{M}]^+$ :  $m/z$  calcd. for  $\text{C}_{15}\text{H}_{12}$ : 192.0, found: 192.

#### 1-methoxy-4-(phenylethynyl)benzene 12b:

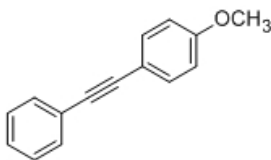

$^1\text{H NMR}$  (500 MHz,  $\text{CDCl}_3$ ):  $\delta$  7.55 (dd,  $J = 7.8, 1.4$  Hz, 2H), 7.52 – 7.49 (m, 2H), 7.39 – 7.33 (m, 3H), 6.92 (t,  $J = 5.7$  Hz, 2H), 3.86 (s, 3H). GC-MS (EI)  $[\text{M}]^+$ :  $m/z$  calcd. for  $\text{C}_{15}\text{H}_{12}\text{O}$ : 208.0, found: 208.

#### 1-chloro-4-(phenylethynyl)benzene 12c:

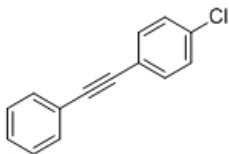

$^1\text{H NMR}$  (500 MHz,  $\text{CDCl}_3$ ):  $\delta$  7.57 (dd,  $J = 6.5, 3.1$  Hz, 2H), 7.49 (d,  $J = 8.4$  Hz, 2H), 7.39 (dd,  $J = 5.0, 1.8$  Hz, 3H), 7.36 (d,  $J = 8.4$  Hz, 2H). GC-MS (EI)  $[\text{M}]^+$ :  $m/z$  calcd. for  $\text{C}_{14}\text{H}_9\text{Cl}$ : 212.0, found: 212.

#### 1-nitro-4-(phenylethynyl)benzene 12d:

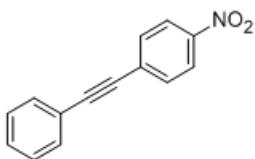

$^1\text{H NMR}$  (500 MHz,  $\text{CDCl}_3$ ):  $\delta$  8.27 – 8.22 (m, 2H), 7.72 – 7.67 (m, 2H), 7.61 – 7.56 (m, 2H), 7.44 – 7.38 (m, 3H). GC-MS (EI)  $[\text{M}]^+$ :  $m/z$  calcd. for  $\text{C}_{14}\text{H}_9\text{NO}_2$ : 223.0, found:223.

**1-nitro-3-(phenylethynyl)benzene 12e:**

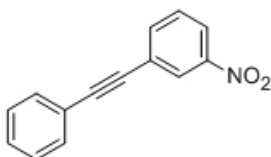

$^1\text{H NMR}$  (500 MHz,  $\text{CDCl}_3$ ):  $\delta$  8.42 – 8.38 (m, 1H), 8.20 (ddd,  $J = 8.3, 2.3, 1.0$  Hz, 1H), 7.88 – 7.82 (m, 1H), 7.57 (ddd,  $J = 17.5, 11.1, 5.2$  Hz, 3H), 7.44 – 7.38 (m, 3H). GC-MS (EI)  $[\text{M}]^+$ :  $m/z$  calcd. for  $\text{C}_{14}\text{H}_9\text{NO}_2$ : 223.0, found: 223.

**2-((3-nitrophenyl)ethynyl)pyridine 12f:**

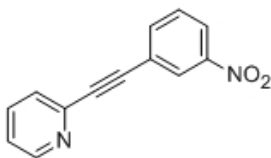

$^1\text{H NMR}$  (500 MHz,  $\text{CDCl}_3$ ):  $\delta$  8.67 (d,  $J = 4.8$  Hz, 1H), 8.45 (d,  $J = 1.6$  Hz, 1H), 8.25 – 8.19 (m, 1H), 7.92 (d,  $J = 7.7$  Hz, 1H), 7.77 (td,  $J = 7.7, 1.7$  Hz, 1H), 7.58 (dd,  $J = 16.8, 8.5$  Hz, 2H), 7.36 – 7.31 (m, 1H). GC-MS (EI)  $[\text{M}]^+$ :  $m/z$  calcd. for  $\text{C}_{13}\text{H}_8\text{N}_2\text{O}_2$ : 224.0, found: 224.

**Quinolone bromides:**

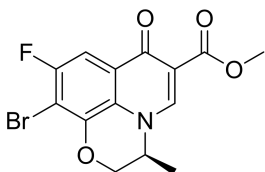

$^1\text{HNMR}$  (500 MHz,  $\text{CDCl}_3$ )  $\delta$  8.68 (s, 1H), 7.57 (d,  $J = 8.9$  Hz, 1H), 4.85 – 4.72 (m, 1H), 4.64 (d,  $J = 1.9$  Hz, 1H), 4.49 (d,  $J = 2.3$  Hz, 1H), 4.24 (dd,  $J = 7.1, 4.0$  Hz, 2H), 1.42 (d,  $J = 6.8$  Hz, 3H), 1.30 (t,  $J = 7.1$  Hz, 3H).  $^{13}\text{C NMR}$  (126 MHz,



DMSO)  $\delta$  172.51, 165.04, 155.39, 146.47, 145.03, 128.65, 123.48, 110.08, 103.41, 101.56, 68.86, 60.34, 53.25, 18.39, 14.61.

**Novel fluoroquinolone derivatives:**

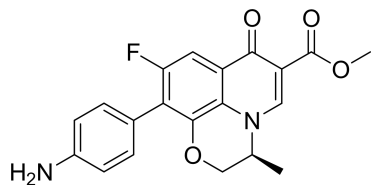

$^1\text{H}$  NMR (500 MHz,  $\text{CDCl}_3$ )  $\delta$  8.40 (s, 1H), 7.80 (dd,  $J = 15.0, 7.0$  Hz, 1H), 7.69 (dd,  $J = 7.8, 4.2$  Hz, 1H), 7.55 (ddd,  $J = 25.2, 15.6, 6.5$  Hz, 1H), 7.47 (dd,  $J = 7.2, 2.8$  Hz, 1H), 7.30 – 7.25 (m, 2H), 6.80 (t,  $J = 21.2$  Hz, 2H), 4.46 – 4.37 (m, 3H), 4.36 (s, 2H), 1.60 (d,  $J = 6.7$  Hz, 3H), 1.44 (t,  $J = 7.1$  Hz, 3H).  $^{13}\text{C}$  NMR (126 MHz,  $\text{CDCl}_3$ )  $\delta$  172.81, 165.86, 156.77, 144.98, 132.29, 130.45, 129.28, 128.34, 123.68, 115.08, 114.99, 110.80, 105.07, 68.13, 60.87, 54.85, 34.56, 29.38, 23.22, 17.93, 14.01.

### 3.Copies of NMR and GC-MS Spectra

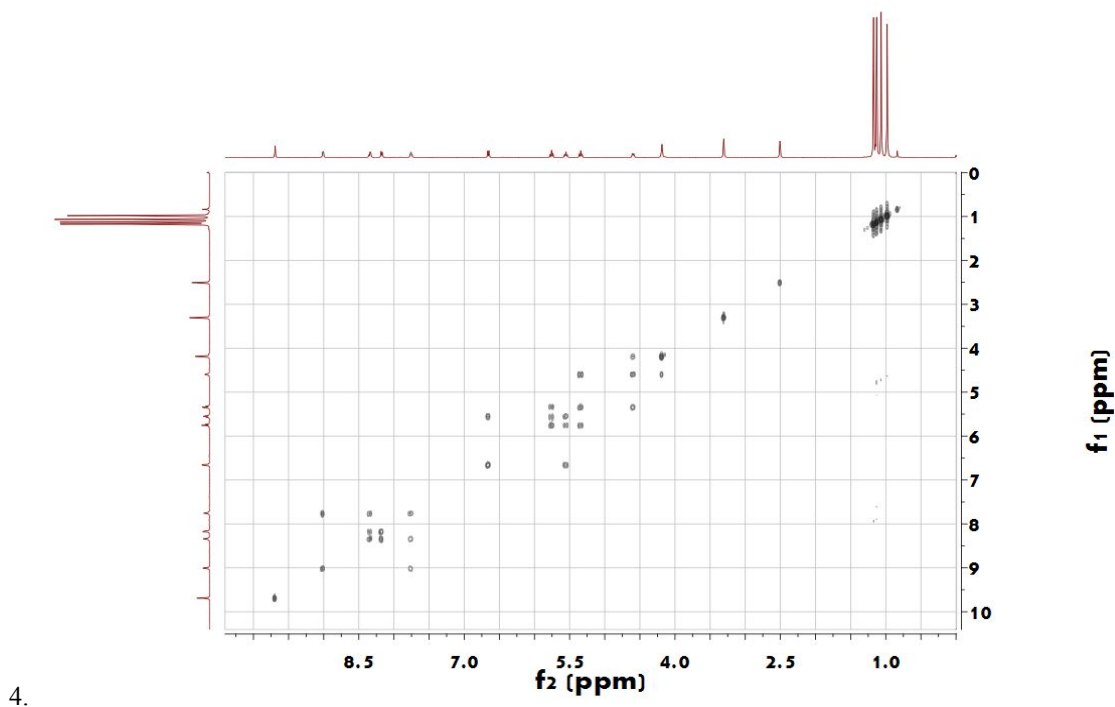

**Figure S1.** 2D ROESY NMR spectrum of Pd catalyst **5c**.

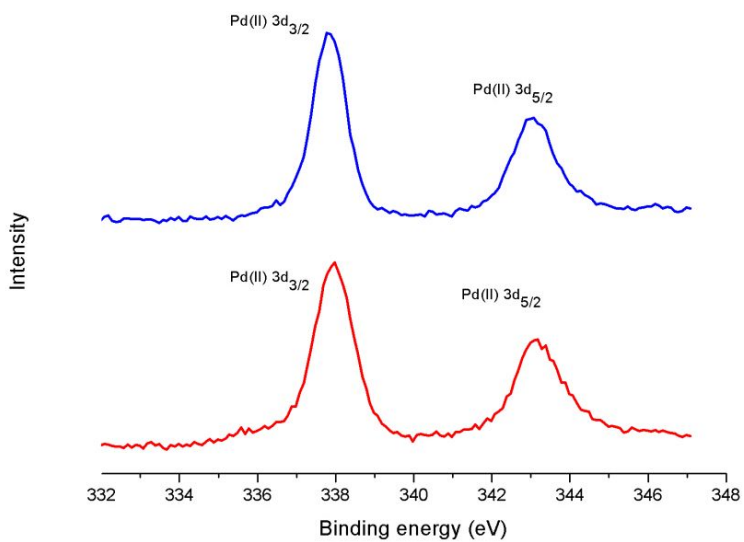

**Figure S2.** XPS analysis of GPT-Pd catalyst **5c** (blue for before and red for after the reaction.)

**Figure S3.** Thermo-gravimetric analysis graphs of GPT-Pd catalysts **5a-d**

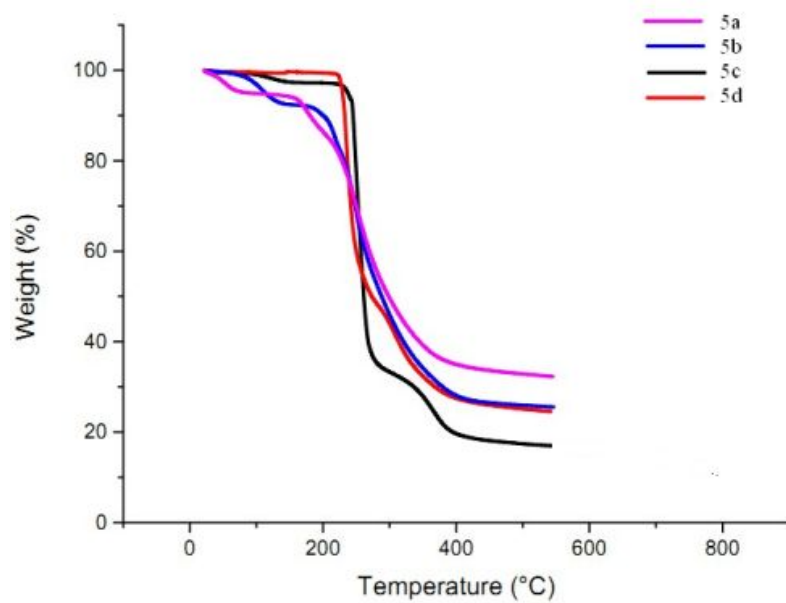

# <sup>1</sup>H NMR

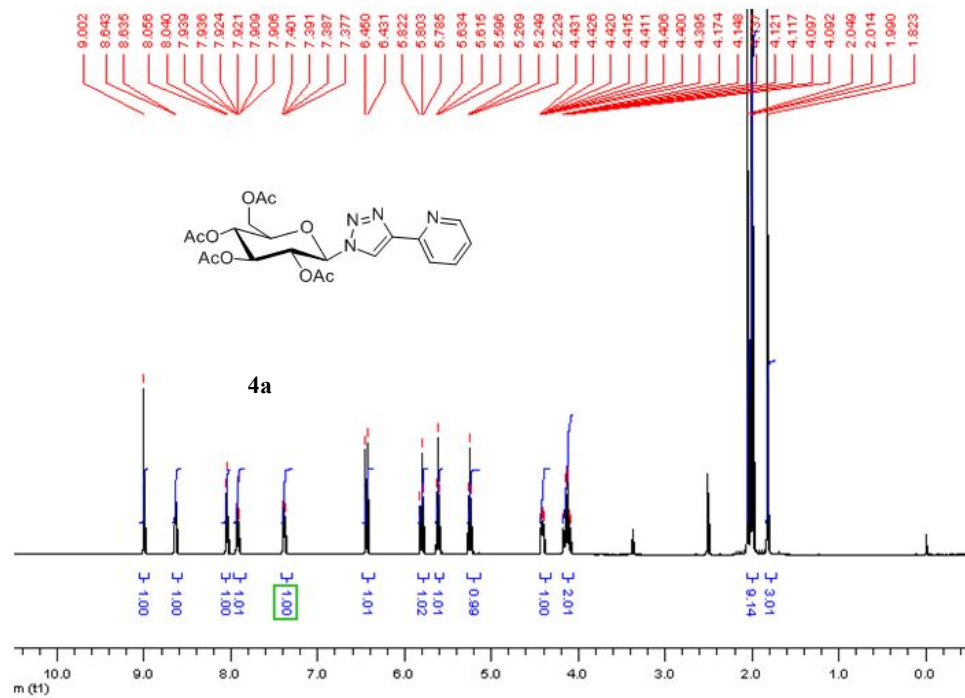

# <sup>13</sup>C NMR

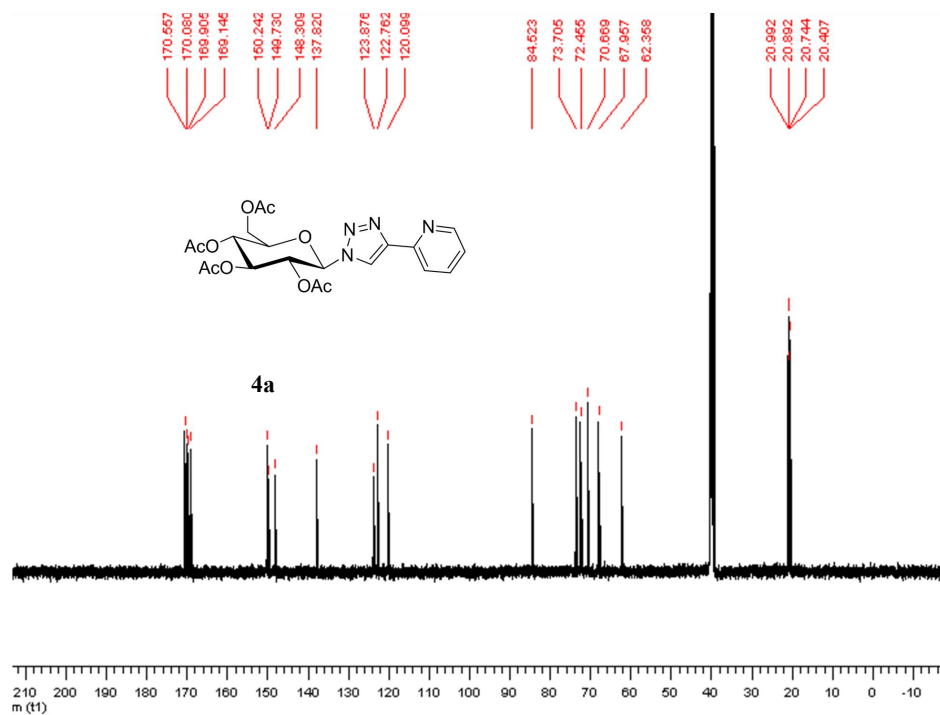



# <sup>1</sup>H NMR

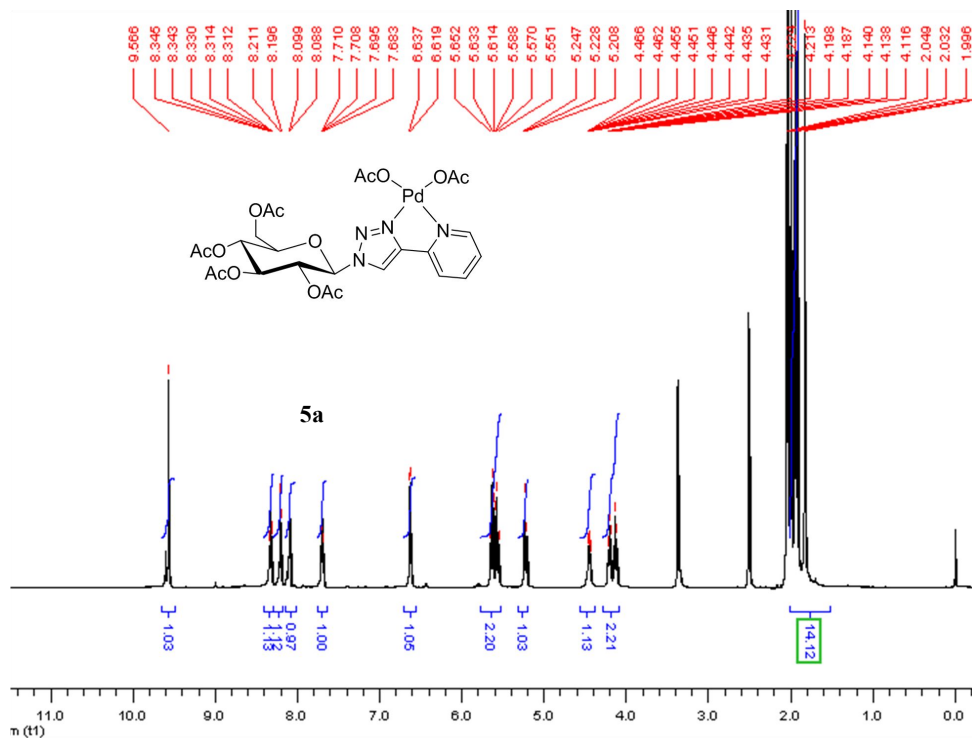

# <sup>13</sup>C NMR

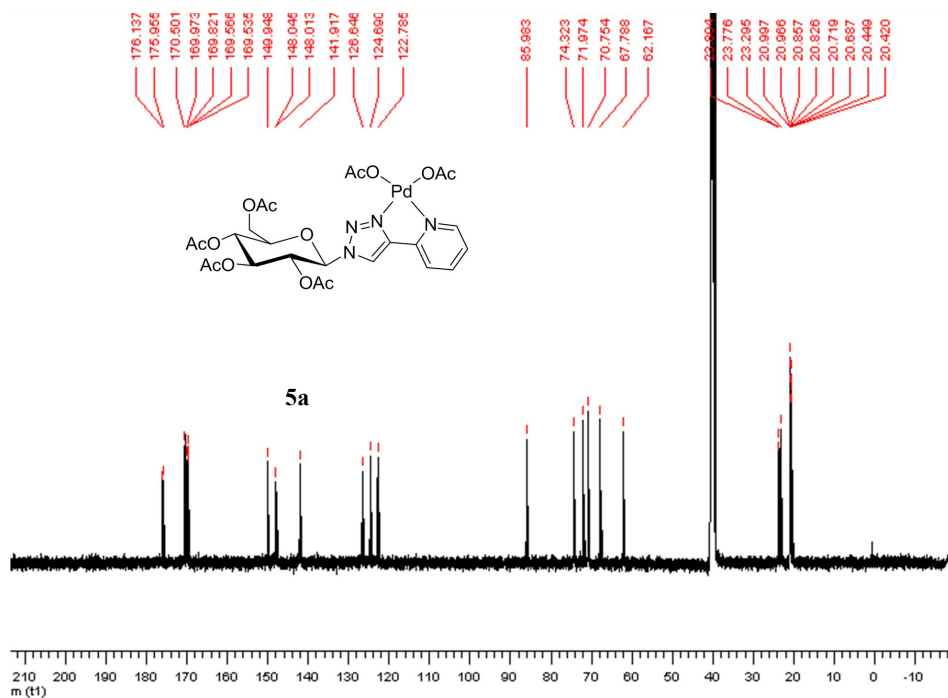

# <sup>1</sup>H NMR

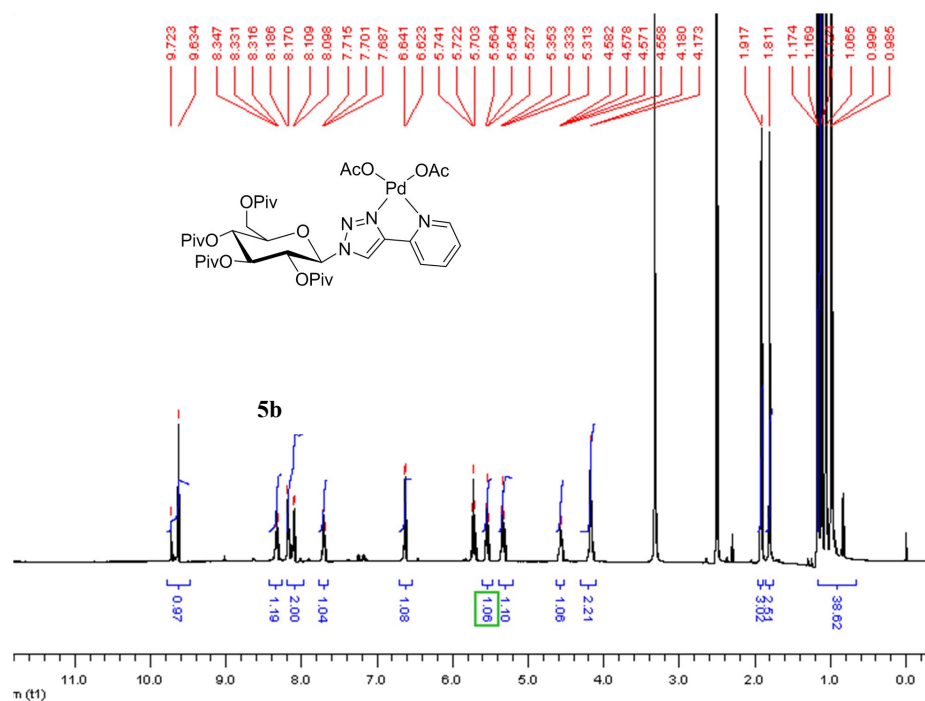

# <sup>13</sup>C NMR

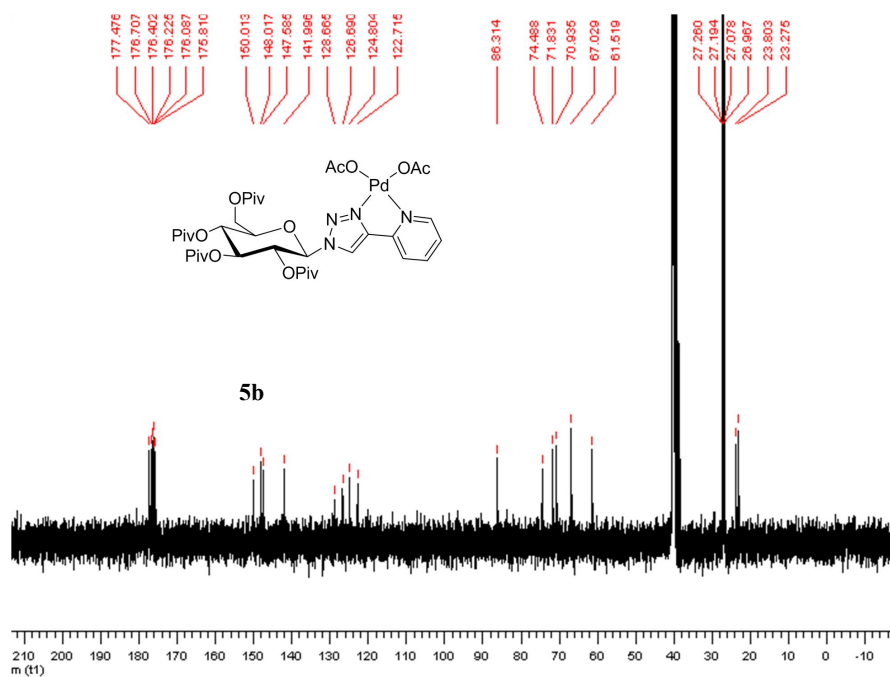

# <sup>1</sup>H NMR

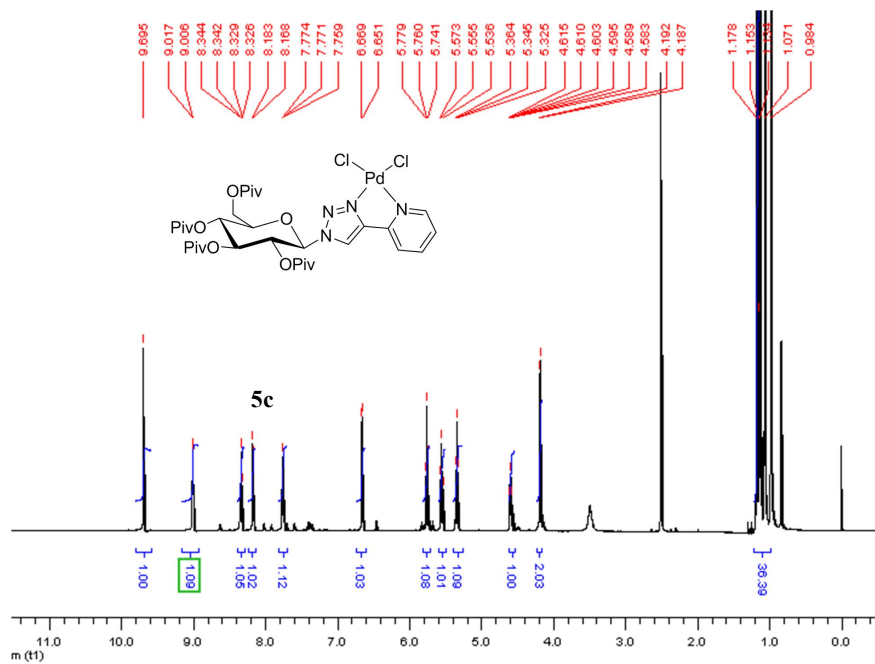

# <sup>13</sup>C NMR

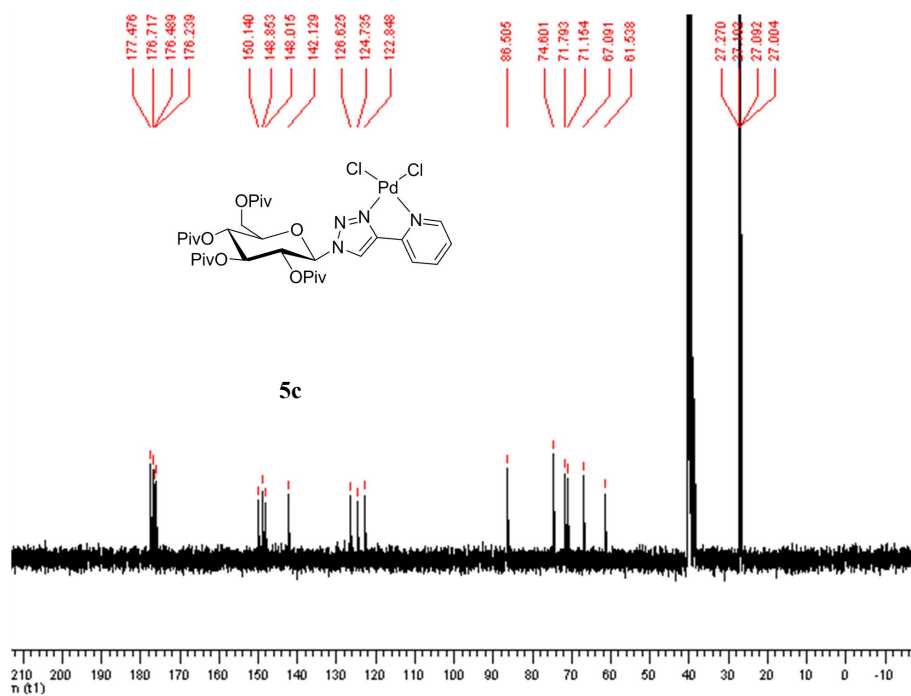



# <sup>1</sup>H NMR

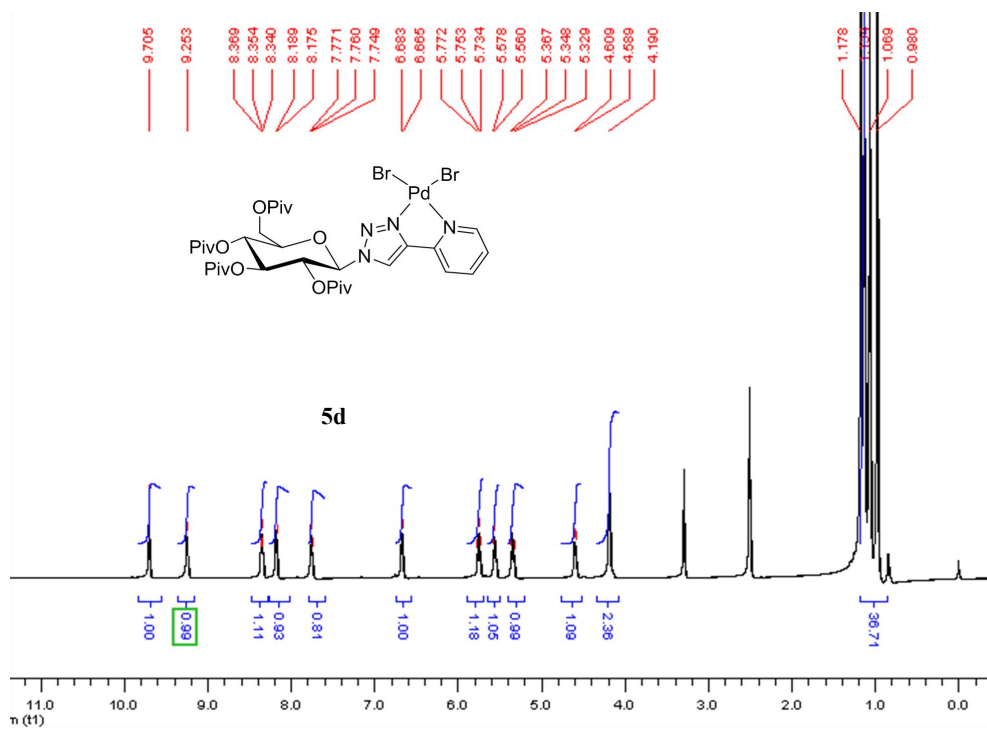

# <sup>13</sup>C NMR

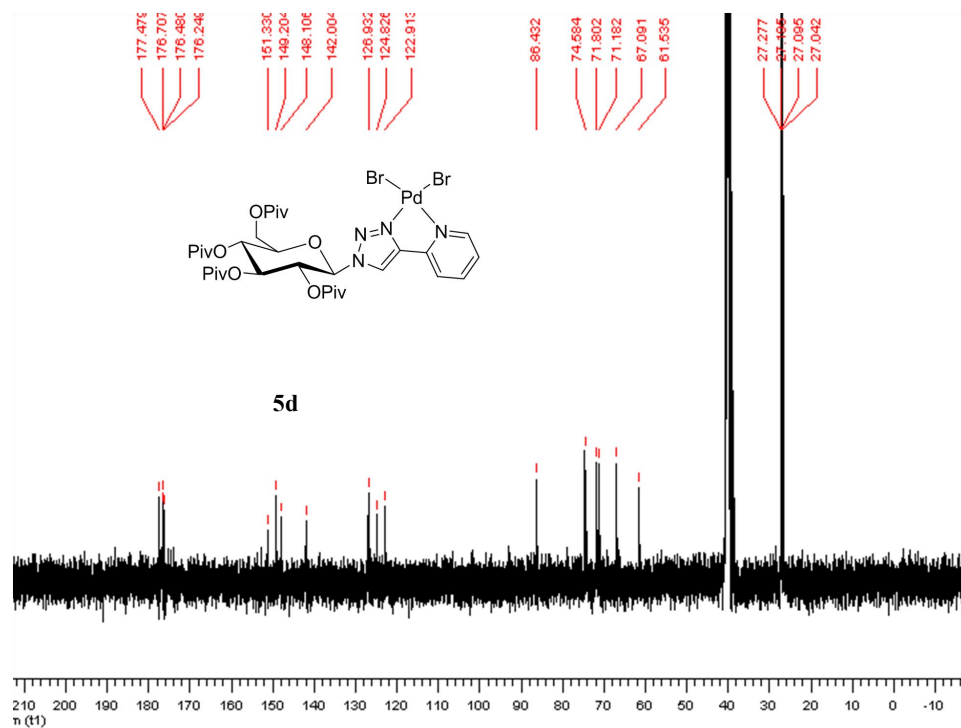

# <sup>1</sup>H NMR

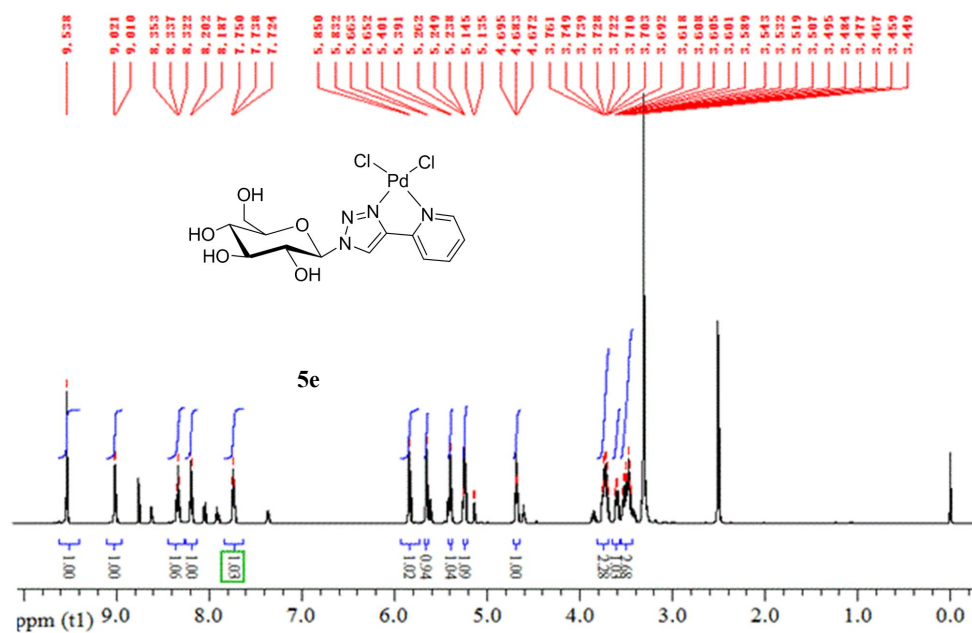

# <sup>13</sup>C NMR

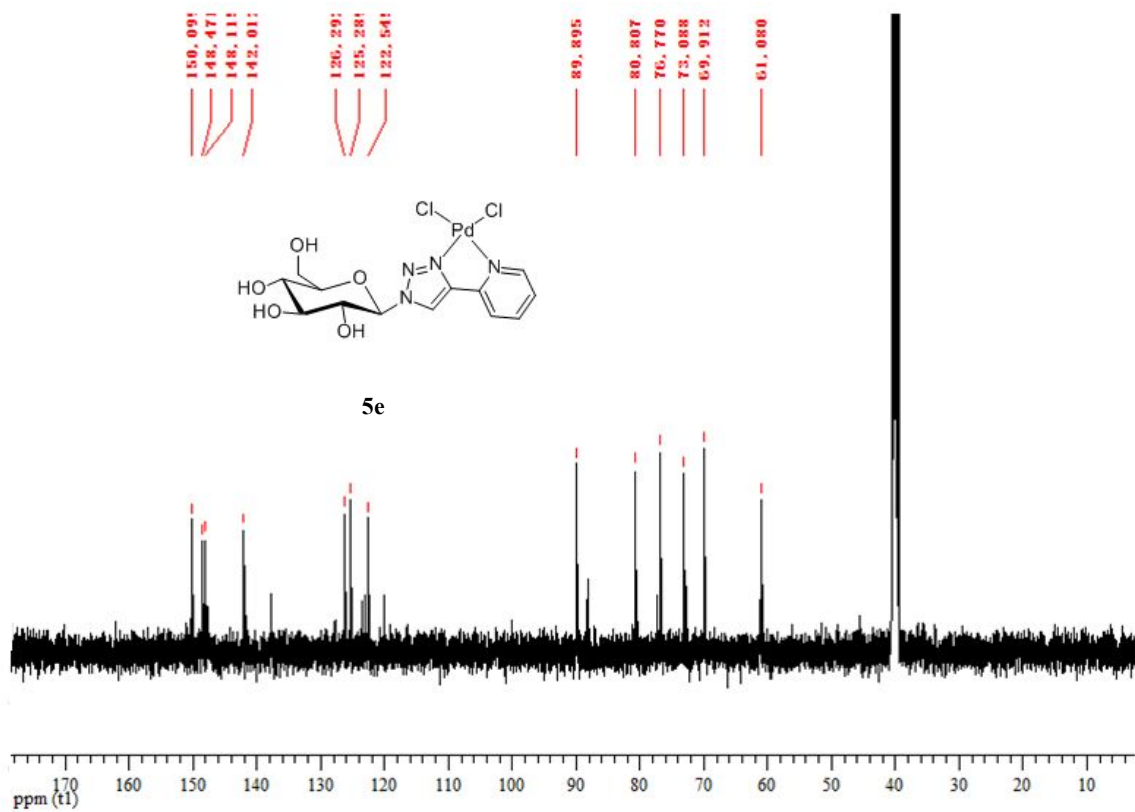

$^1\text{H}$  NMR

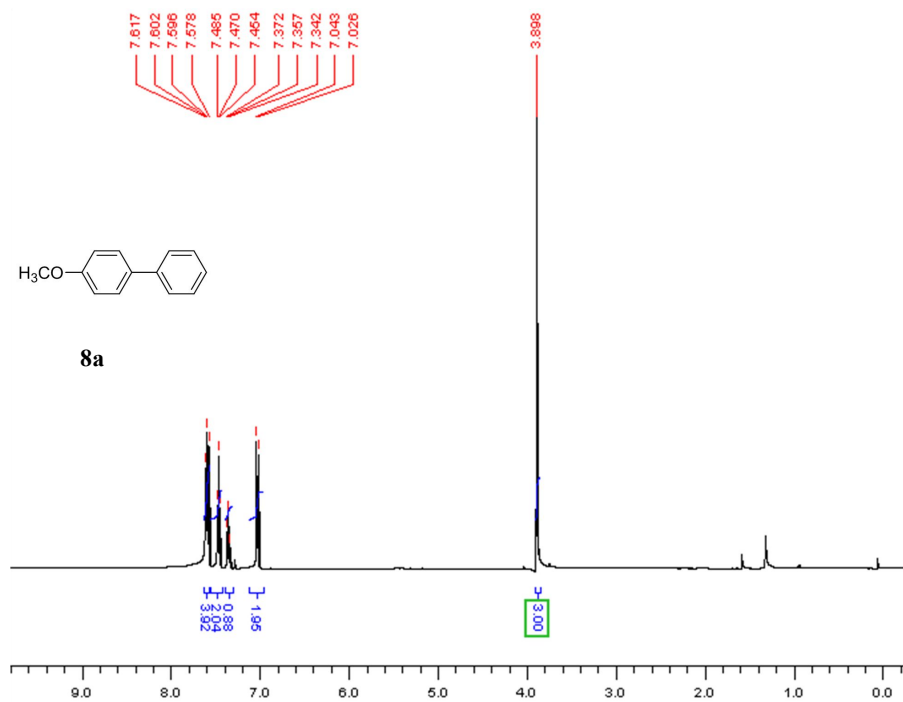

$^1\text{H}$  NMR

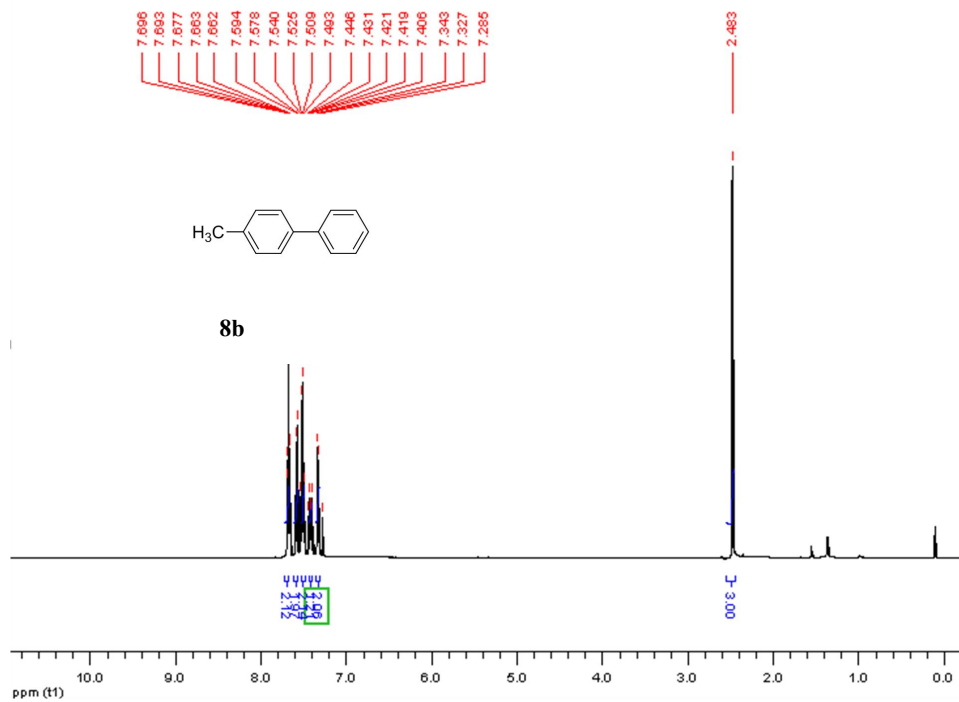



<sup>1</sup>H NMR

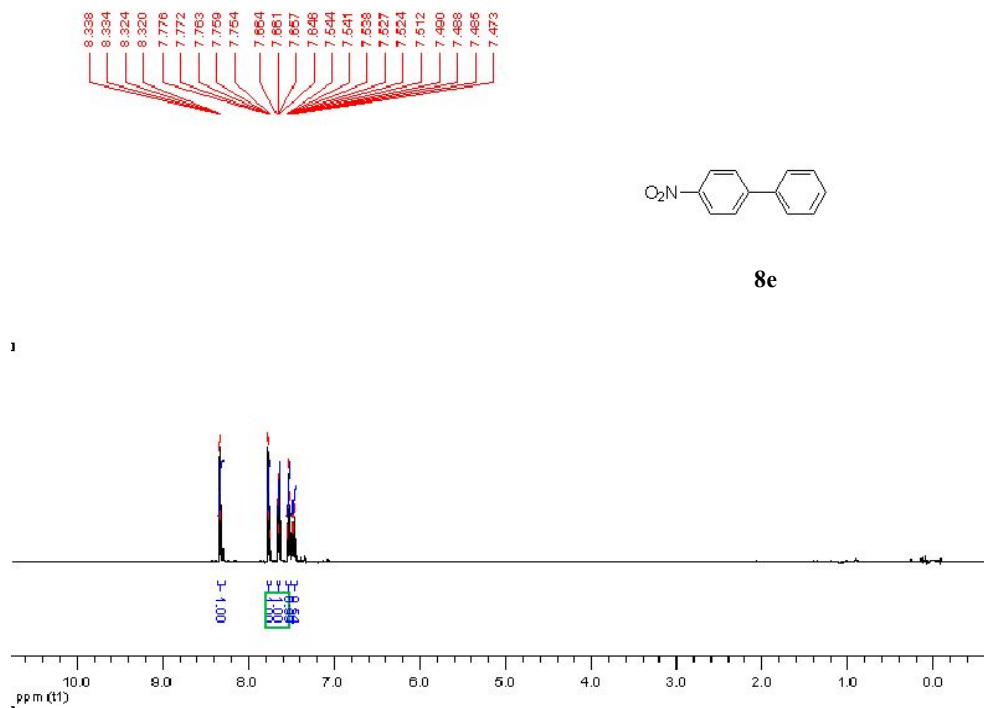

<sup>1</sup>H NMR

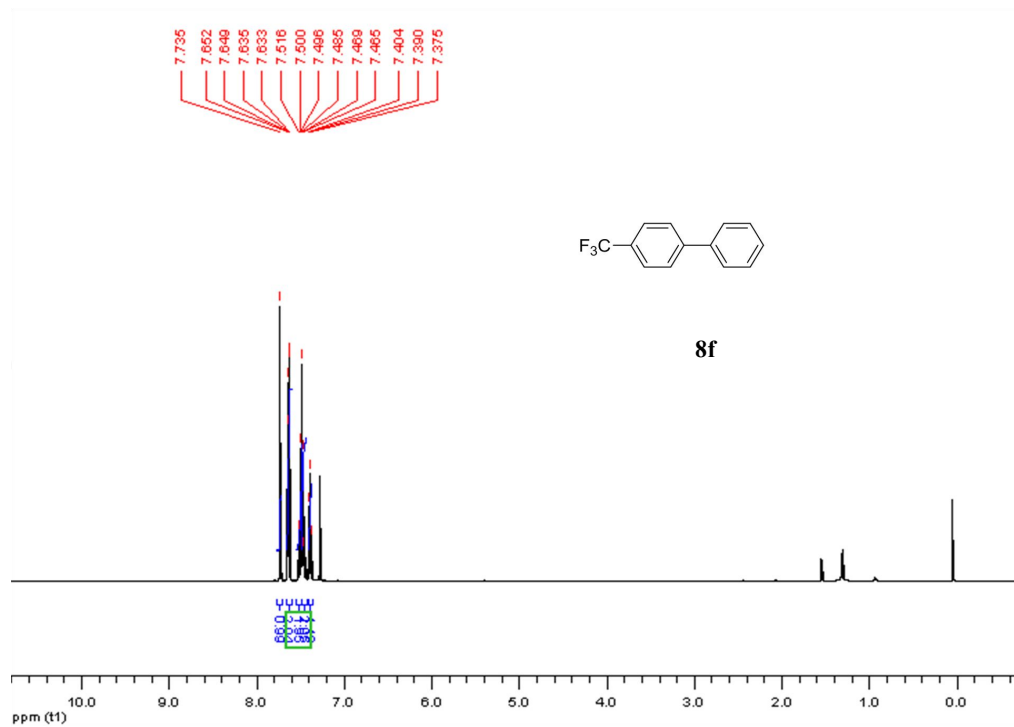

<sup>1</sup>H NMR

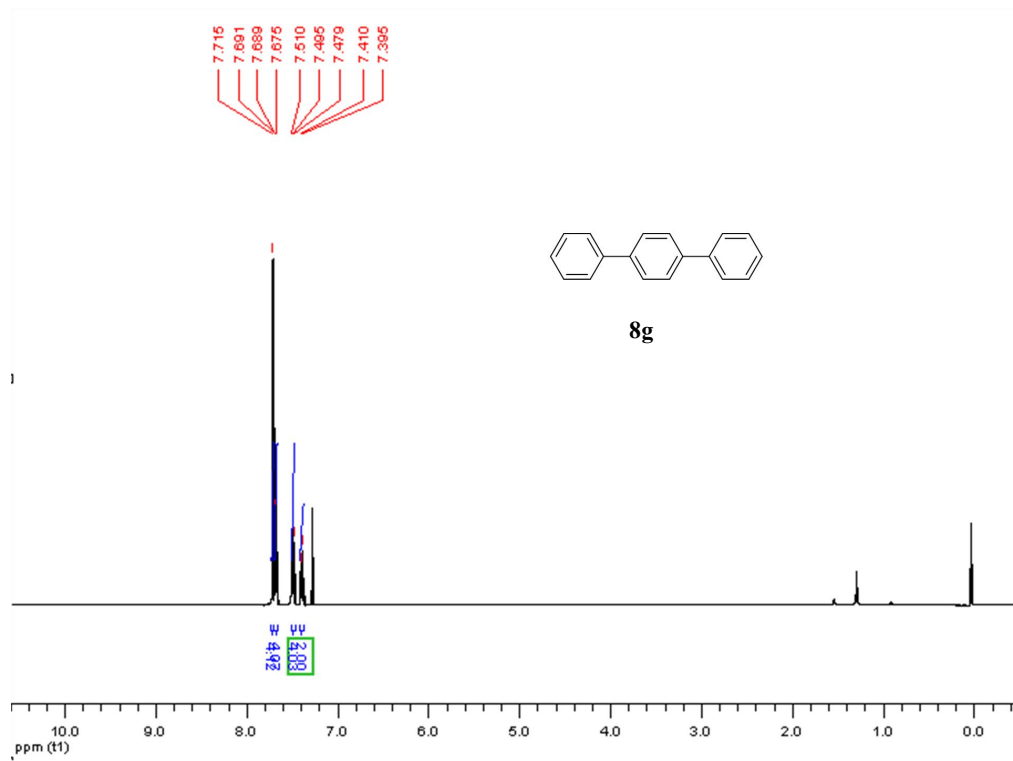

<sup>1</sup>H NMR

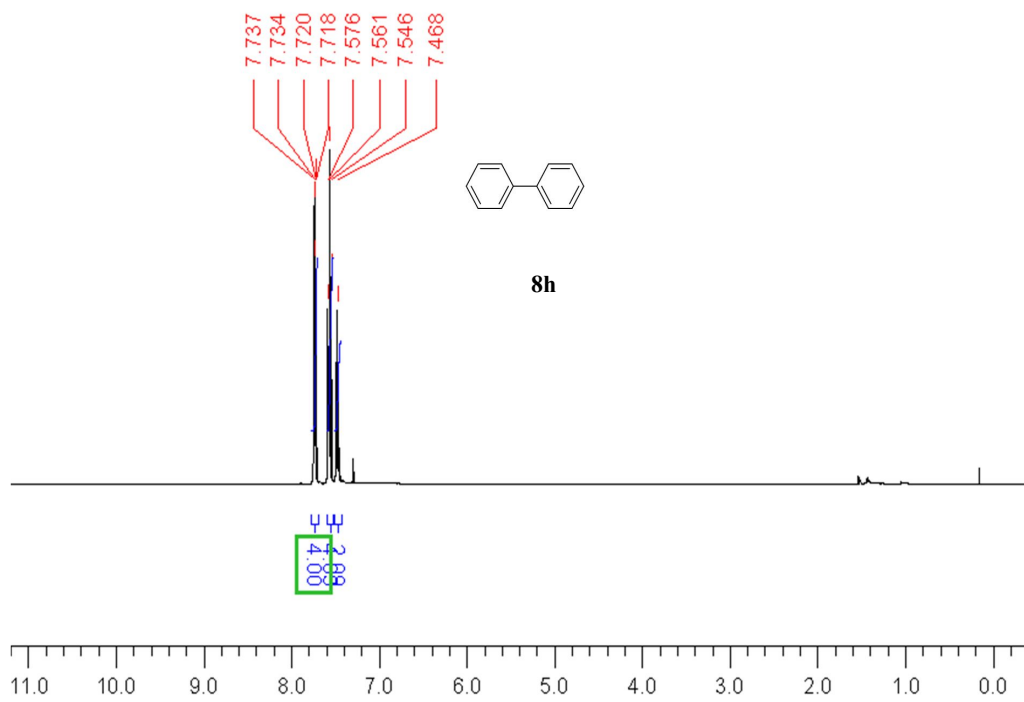



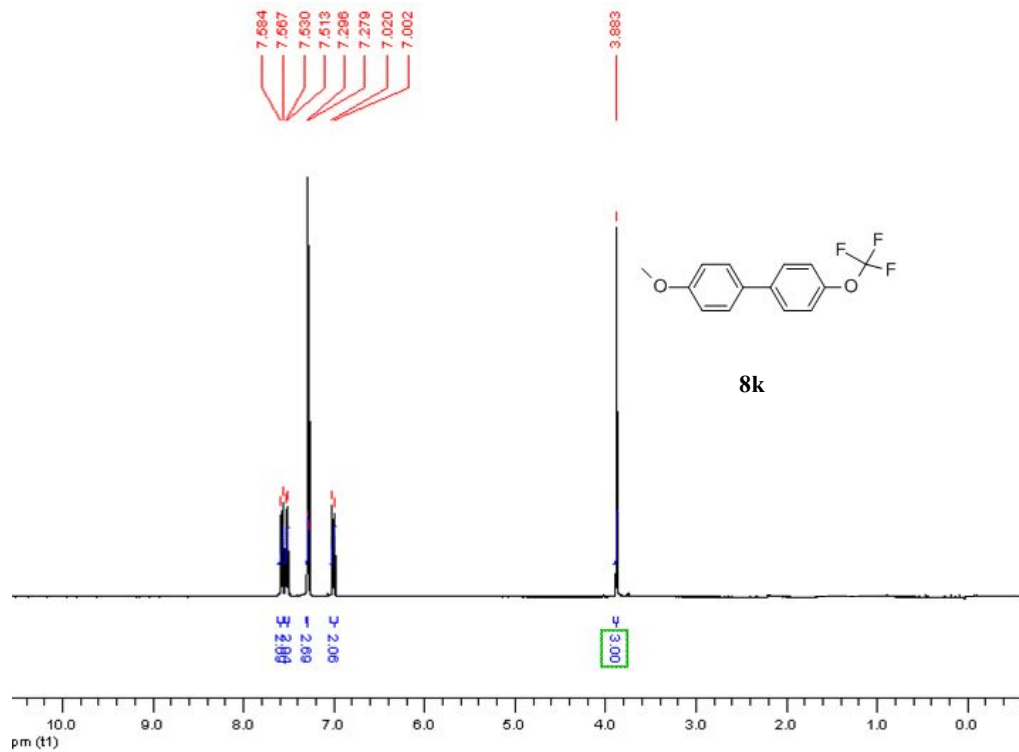

<sup>1</sup>H NMR

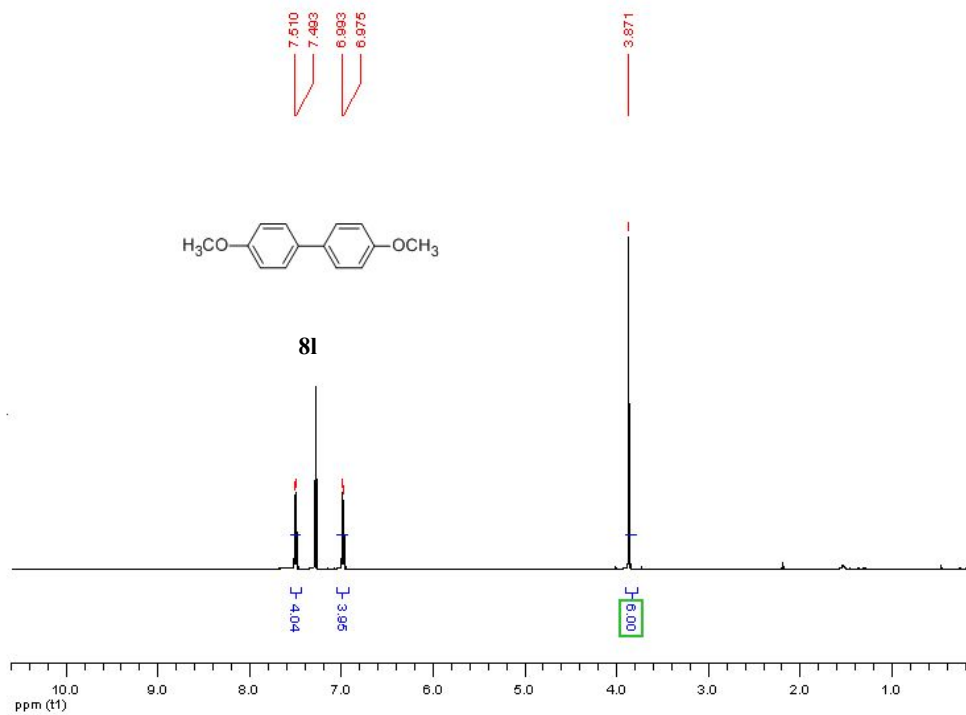

<sup>1</sup>H NMR





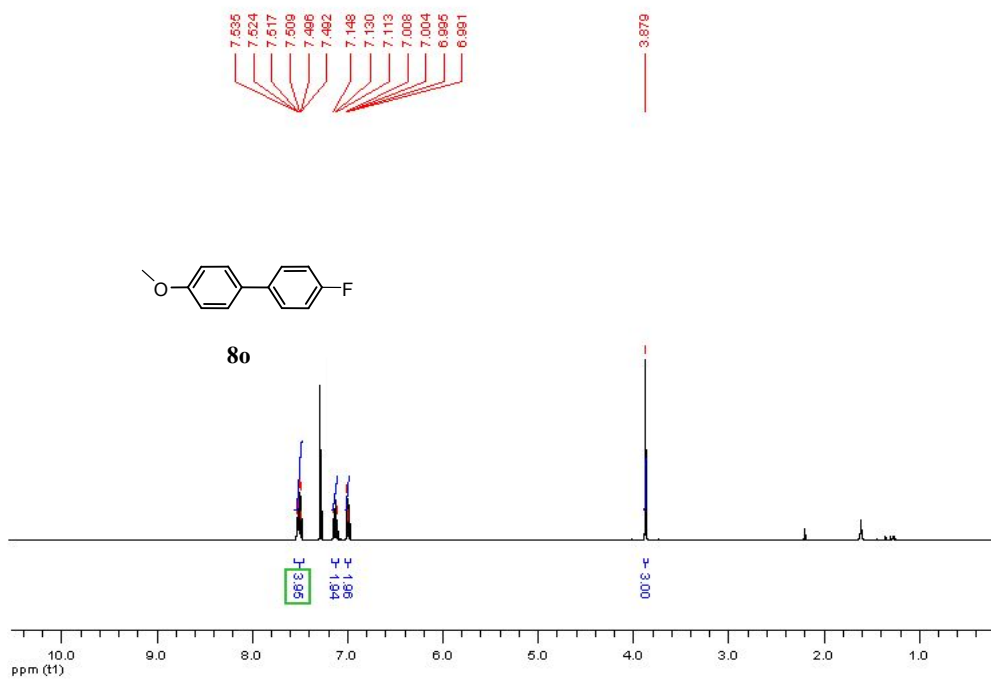

<sup>1</sup>H NMR

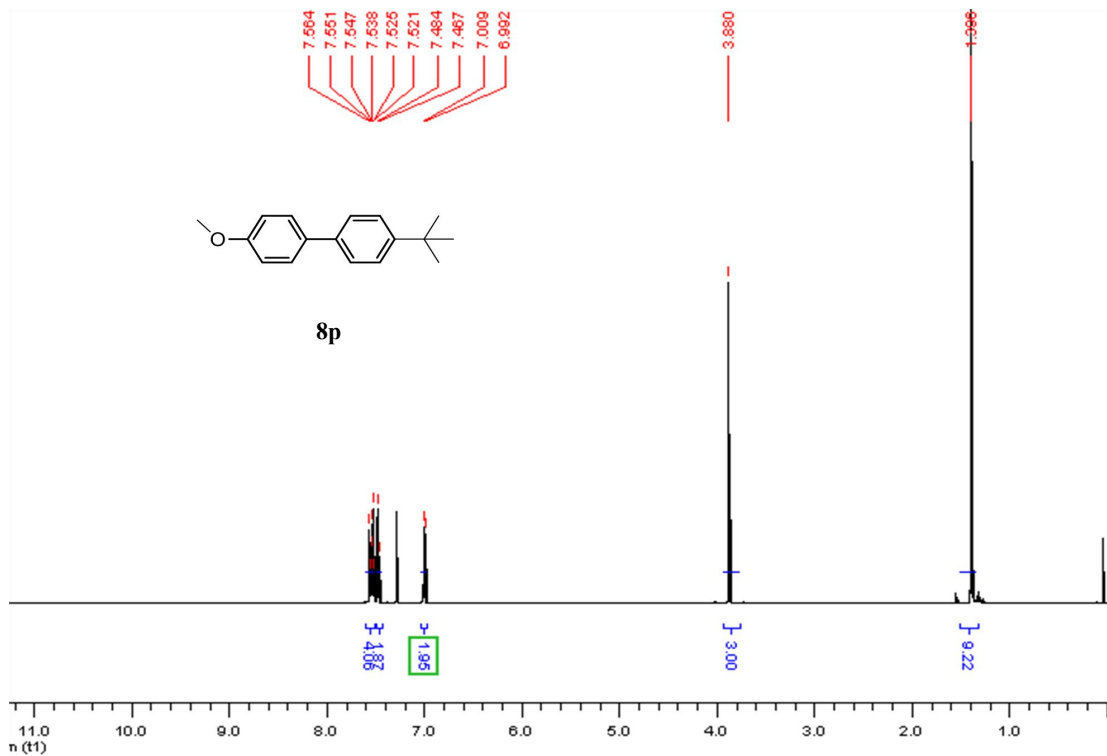

<sup>1</sup>H NMR

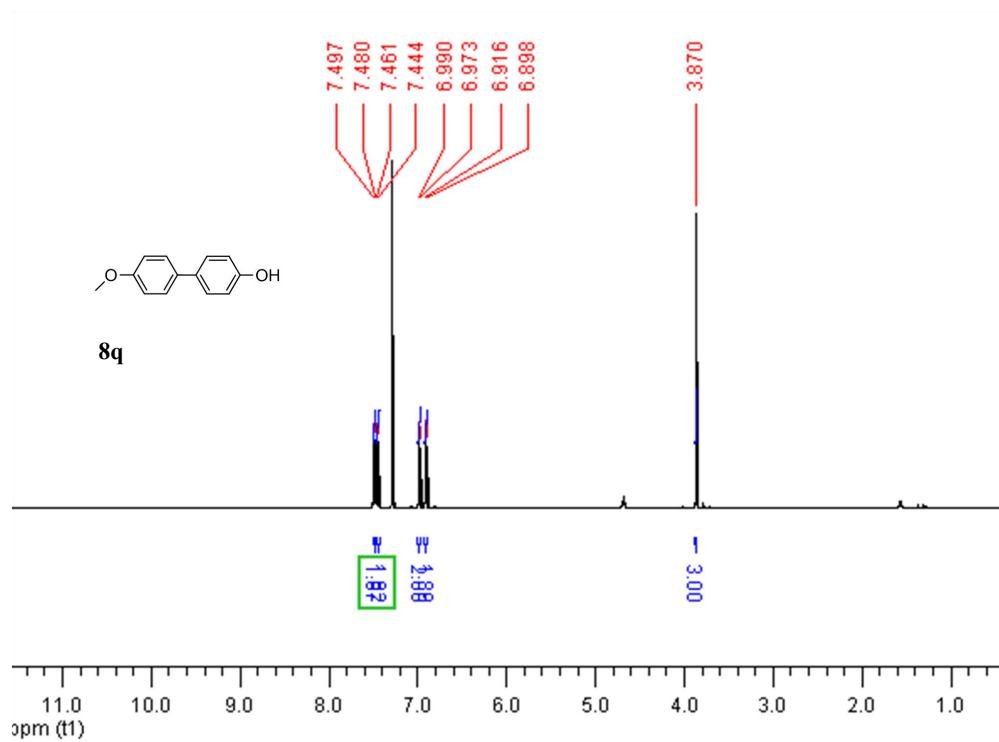

<sup>1</sup>H NMR

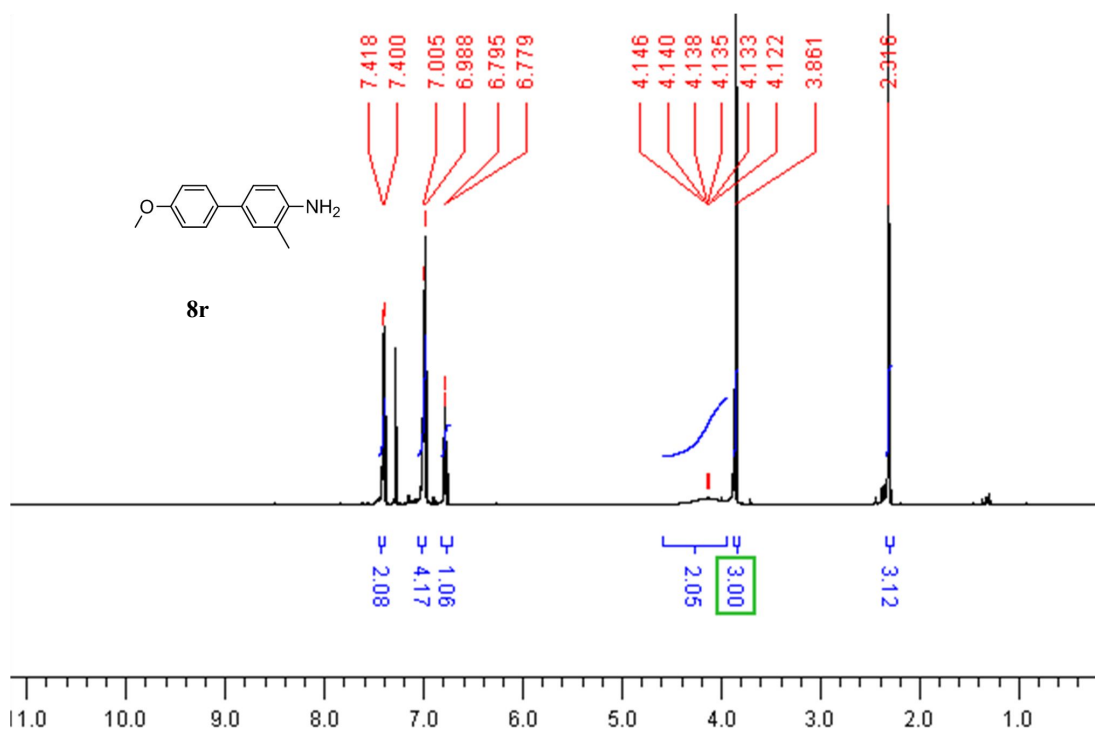

<sup>1</sup>H NMR

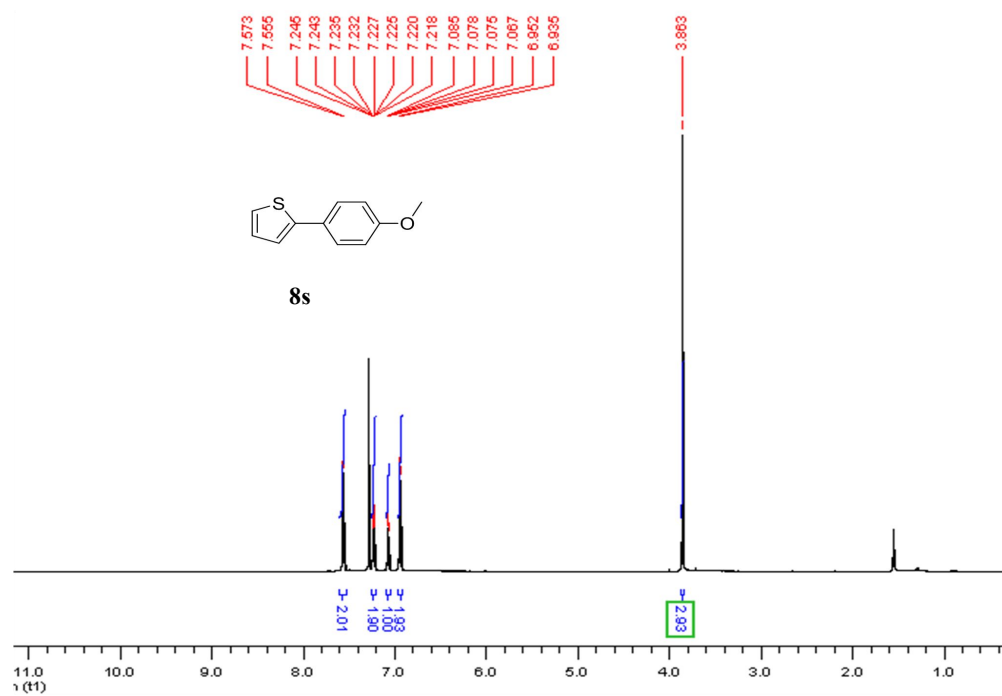

<sup>1</sup>H NMR

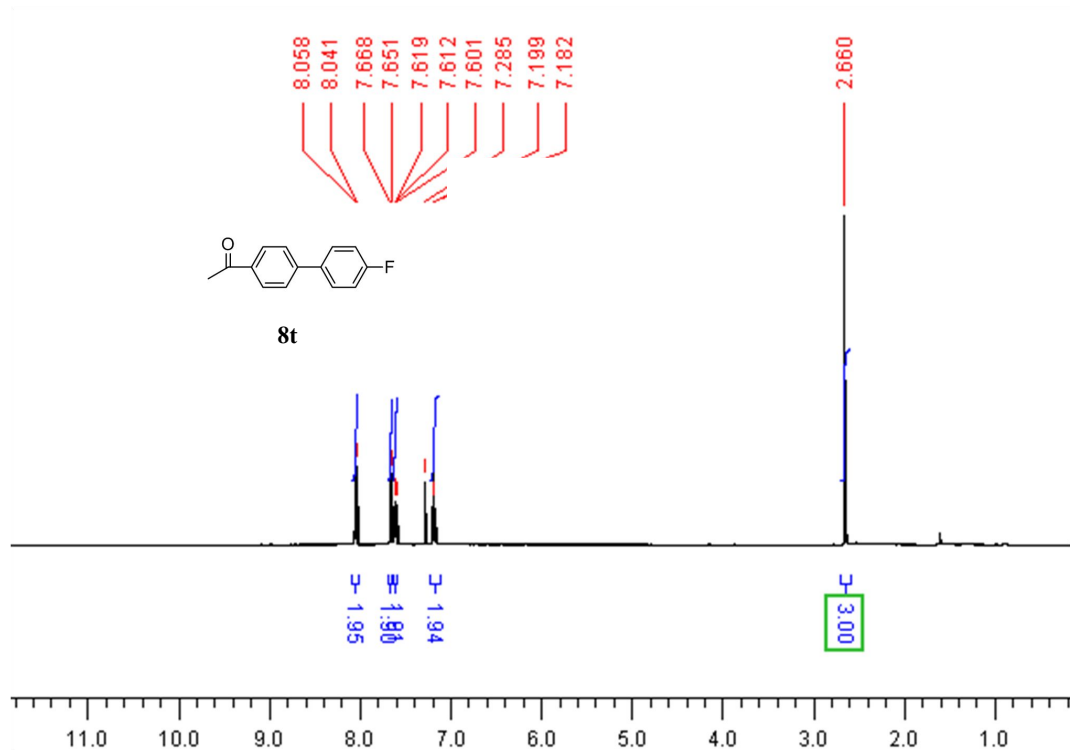

<sup>1</sup>H NMR

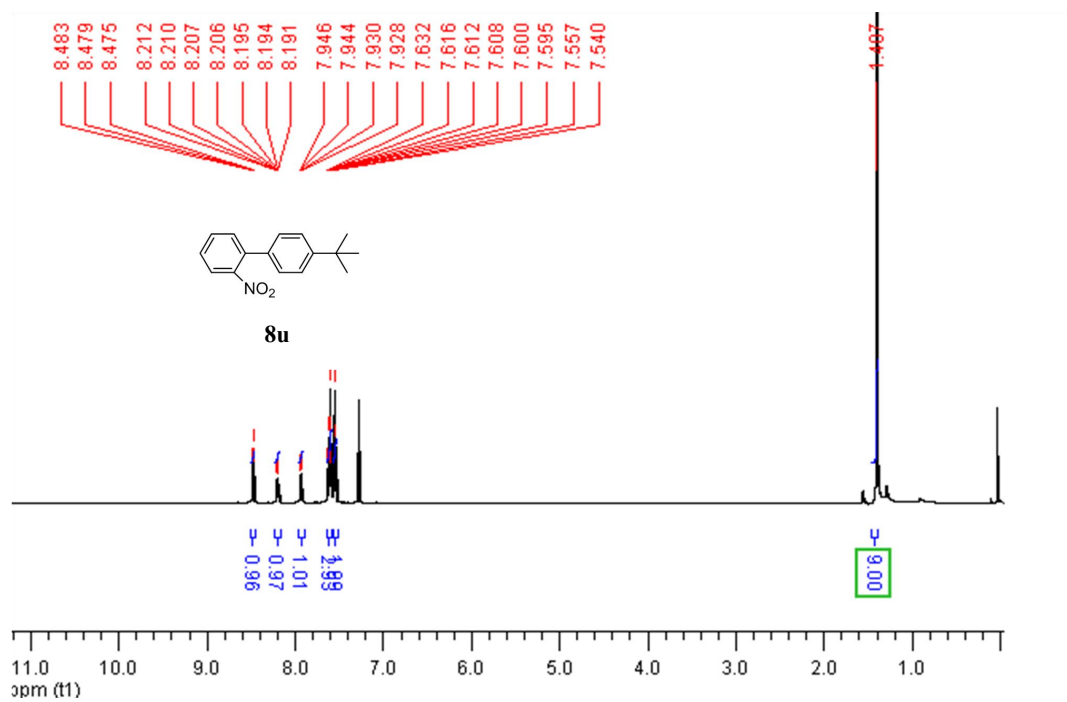

<sup>1</sup>H NMR

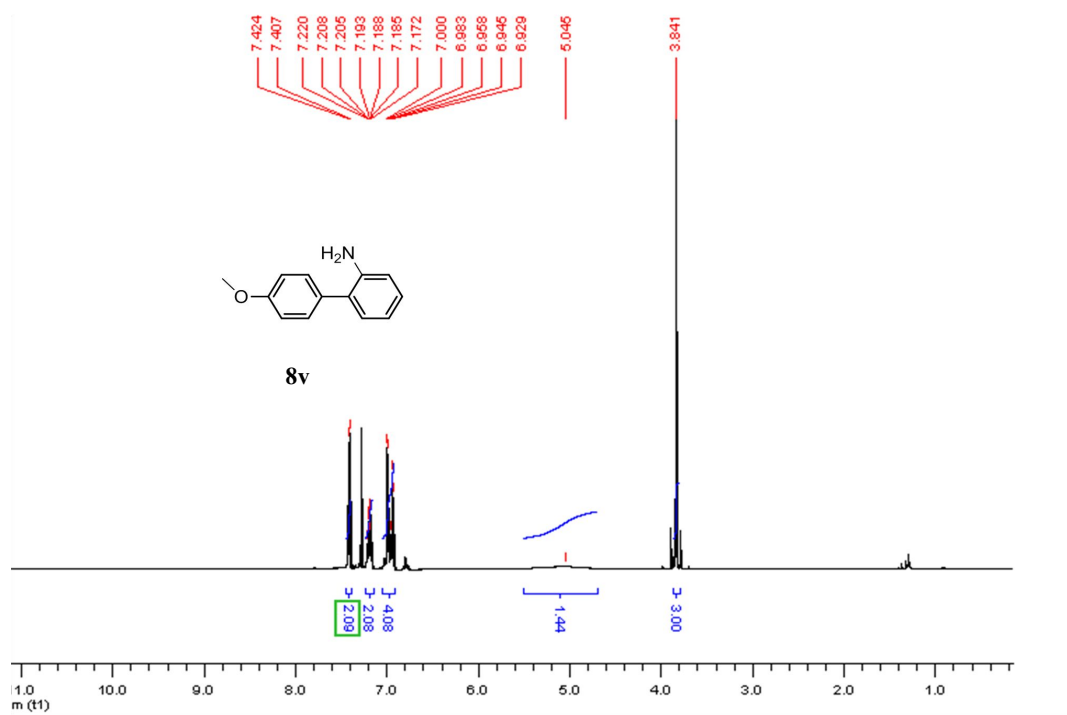











<sup>1</sup>H NMR

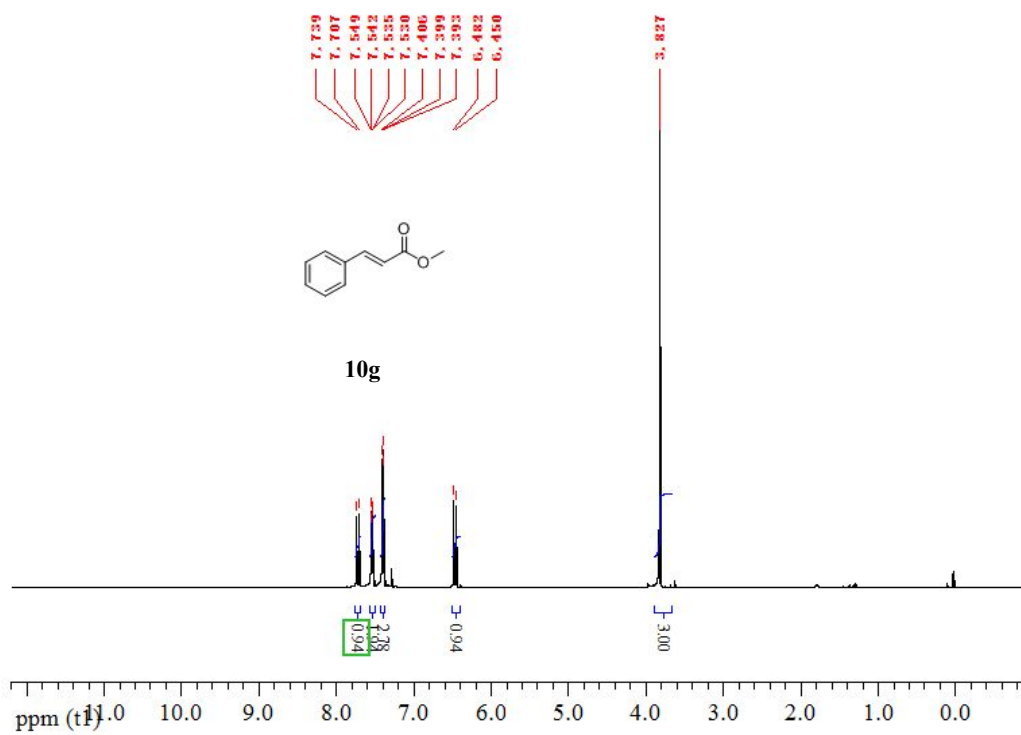

<sup>1</sup>H NMR

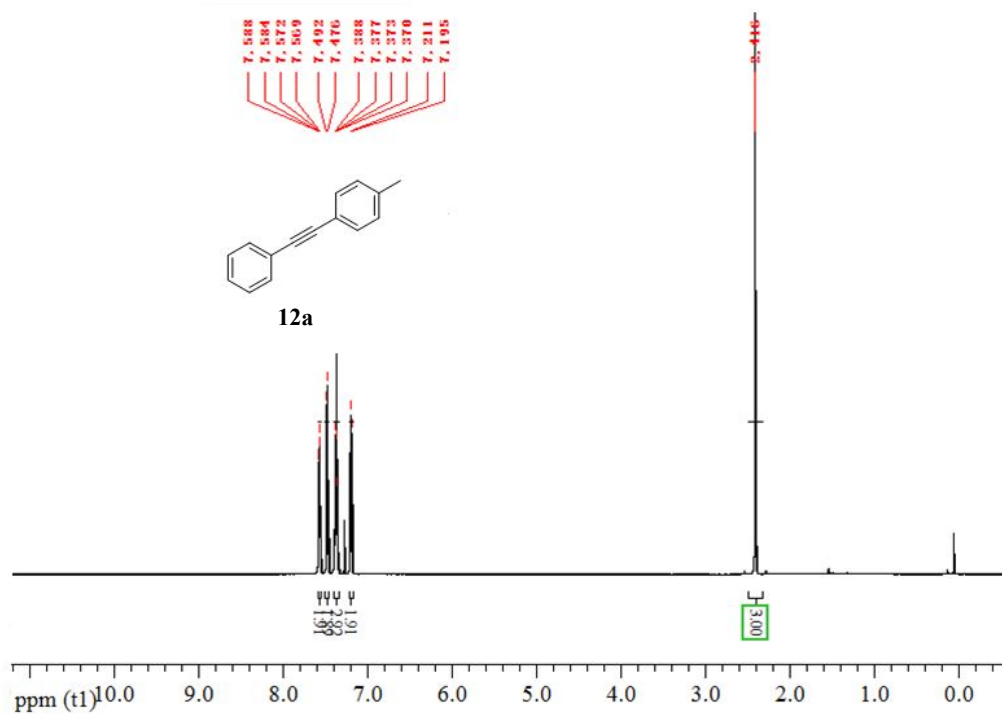

<sup>1</sup>H NMR

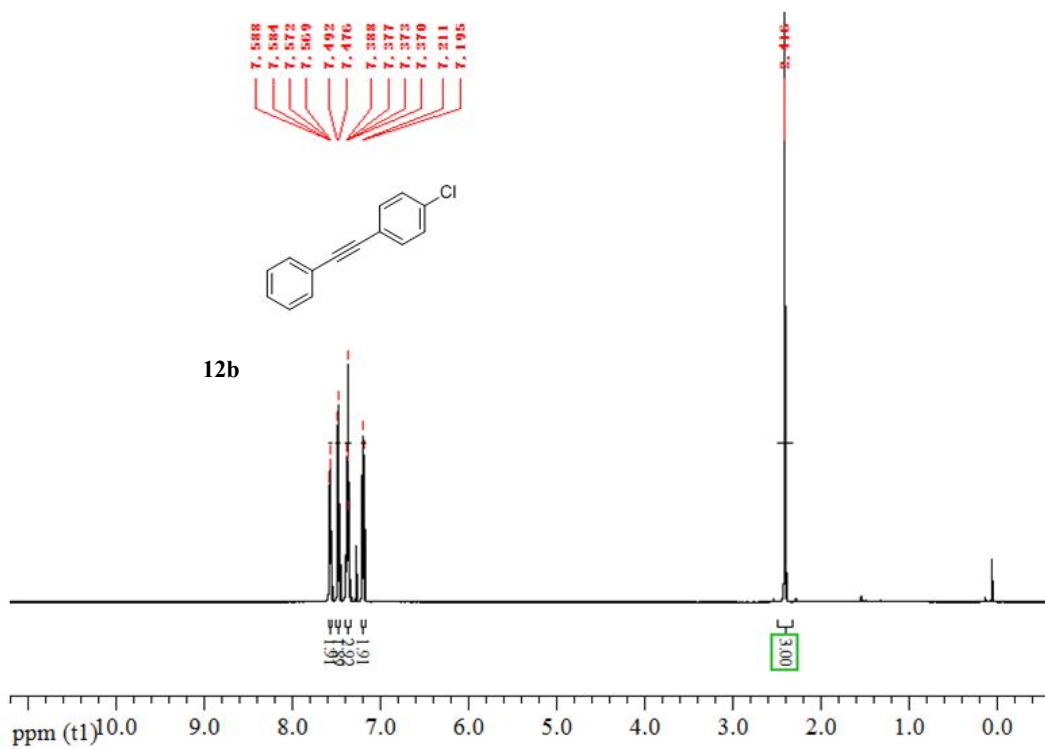

<sup>1</sup>H NMR

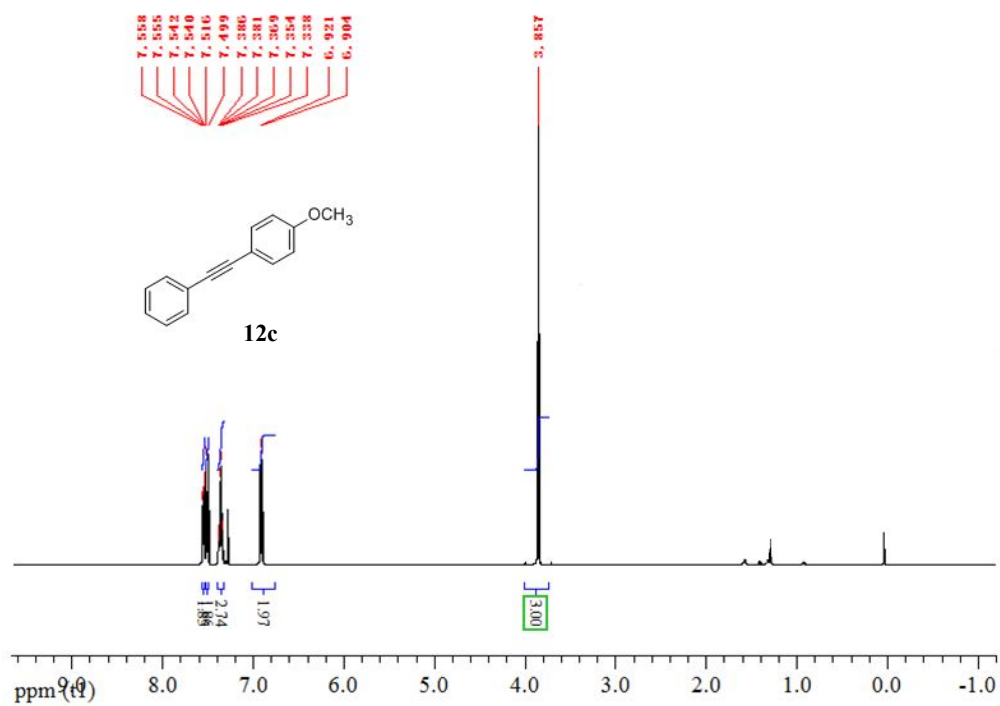

<sup>1</sup>H NMR

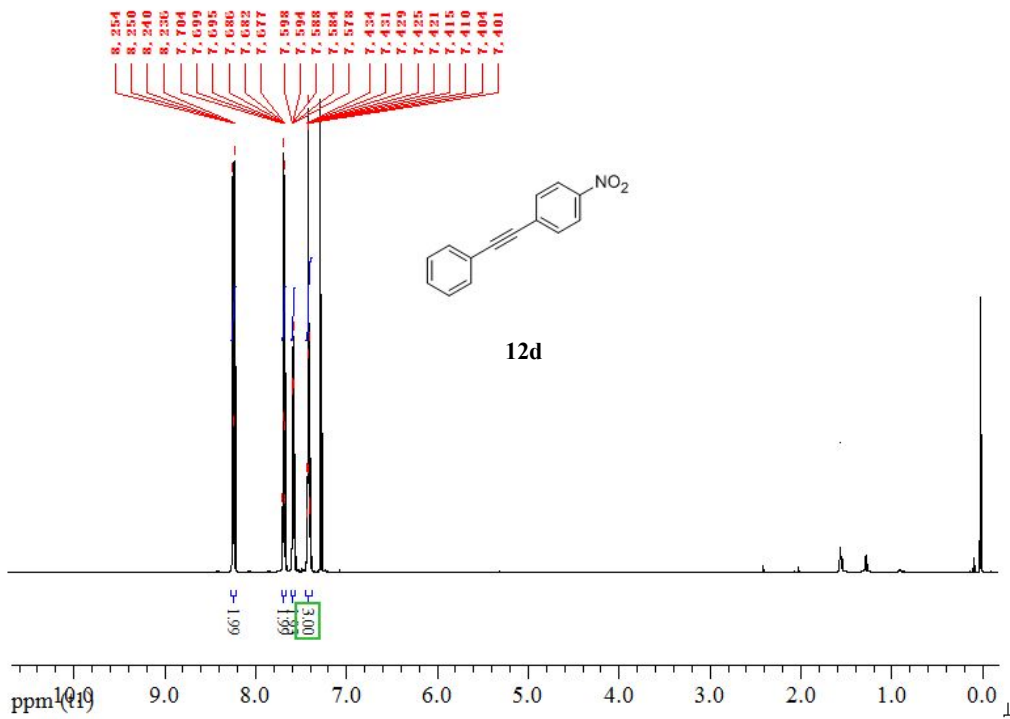

<sup>1</sup>H NMR

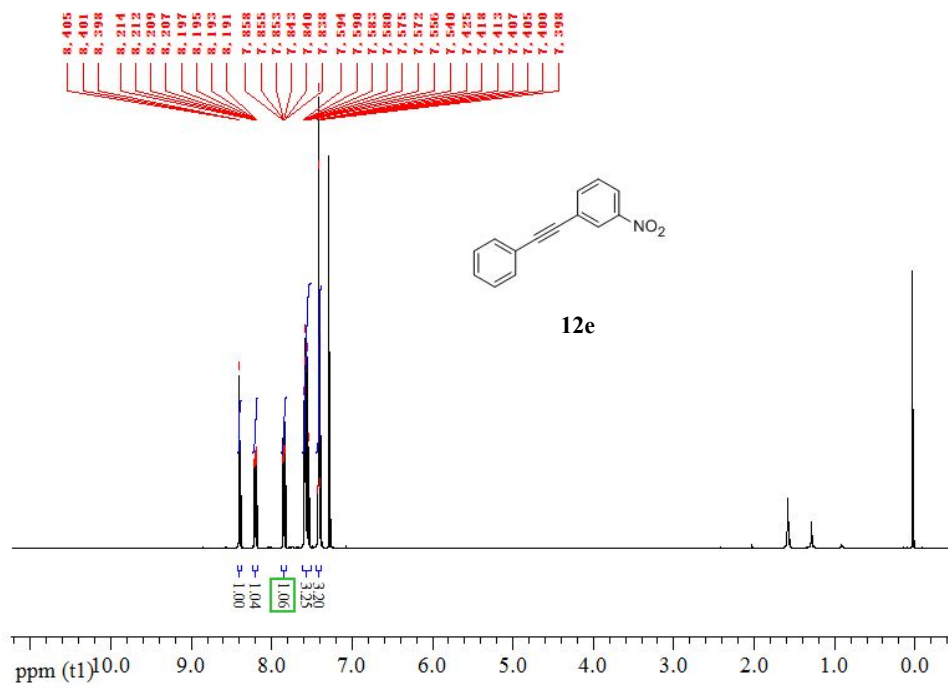

<sup>1</sup>H NMR

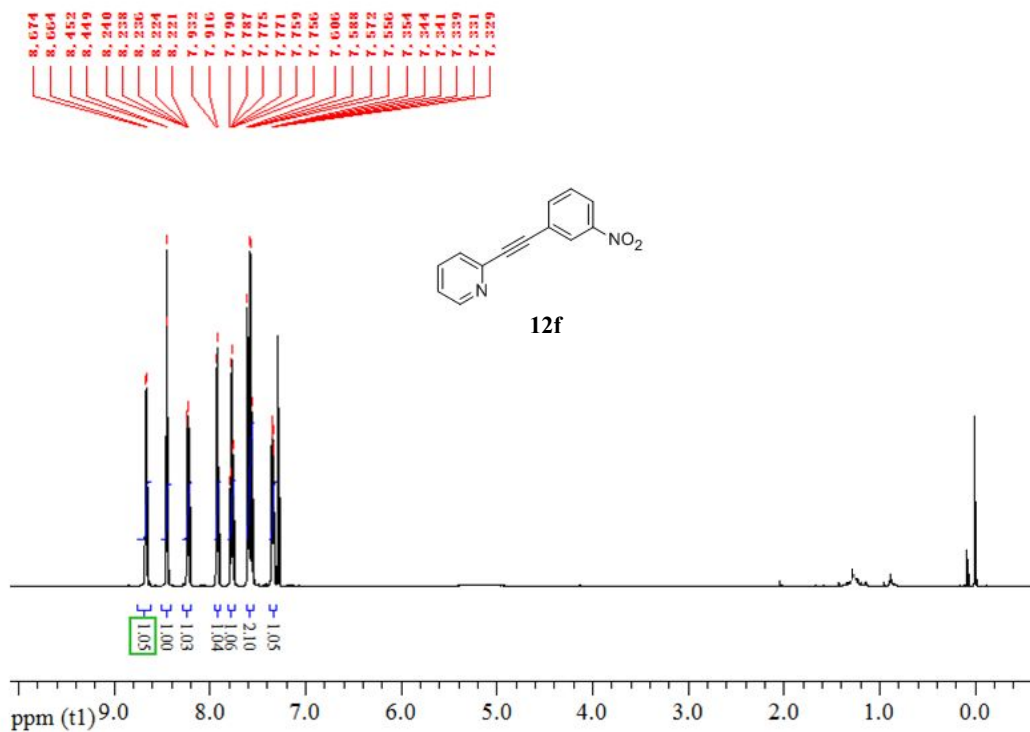

Quinolone bromides:

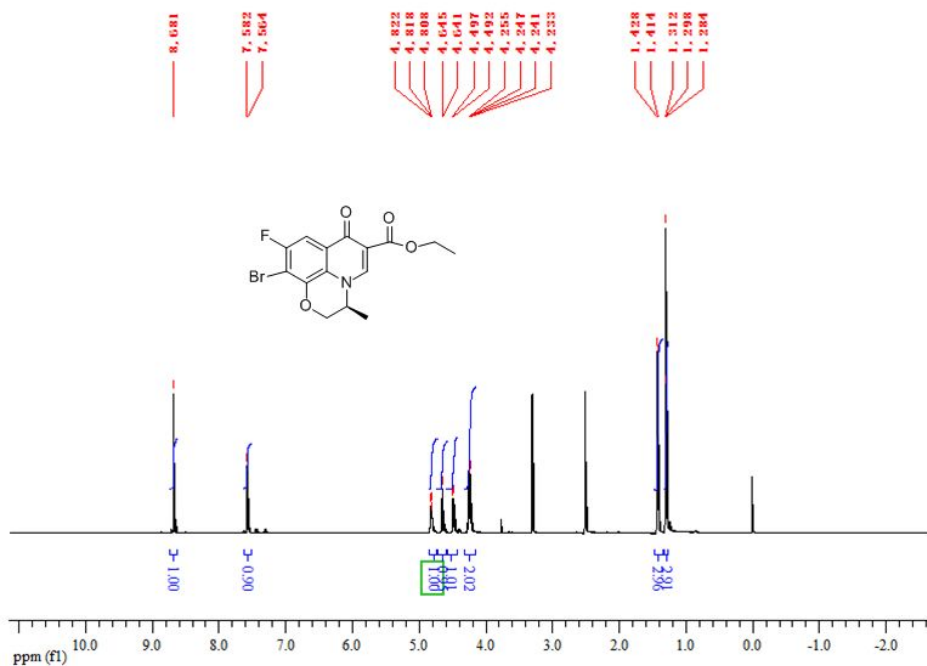



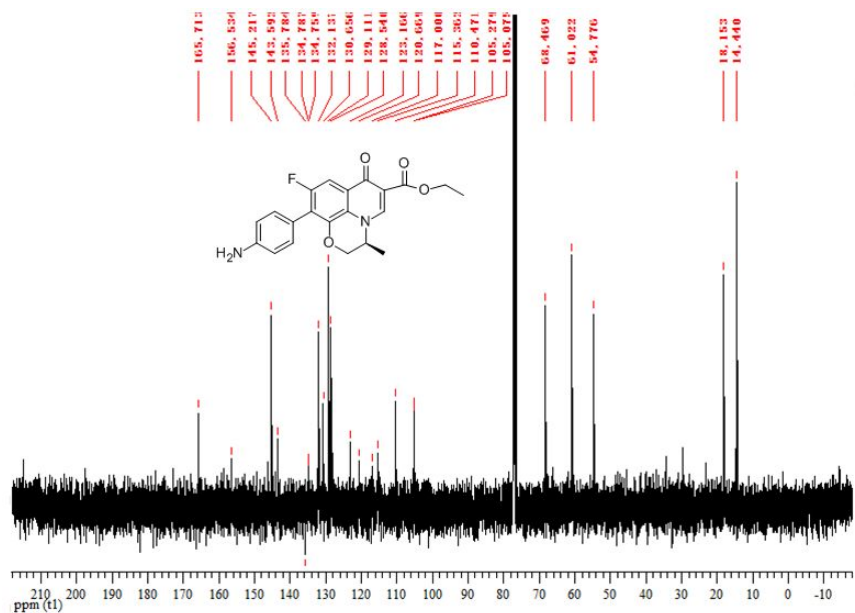

**The selected GC-MS chromatogram of products:  
4-methoxybiphenyl 8a:**

GC-MS (EI) [M]<sup>+</sup>: m/z calcd. for C<sub>13</sub>H<sub>12</sub>O: 184.0, found: 184.

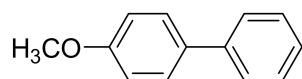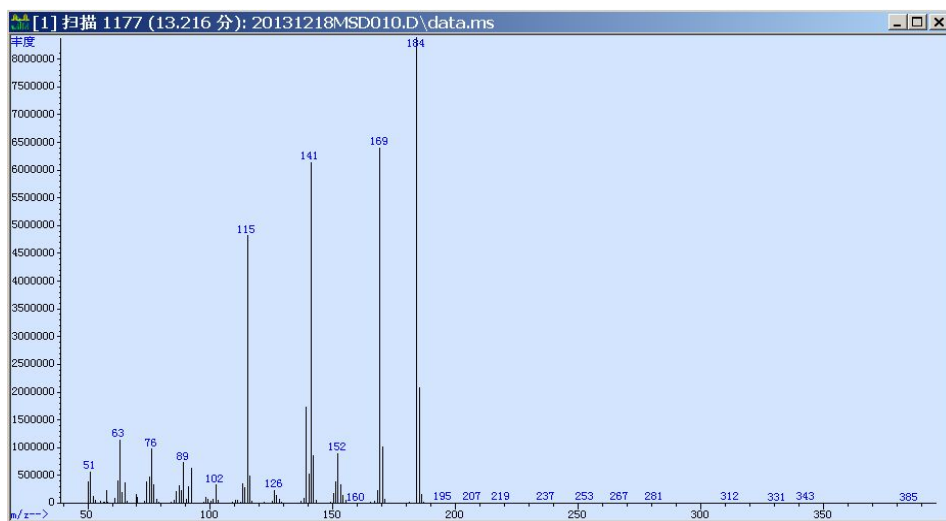

### 4-methylbiphenyl 8b:

GC-MS (EI) [M]<sup>+</sup>: m/z calcd. for C<sub>13</sub>H<sub>12</sub>: 168.0, found: 168.

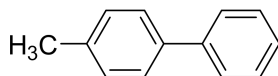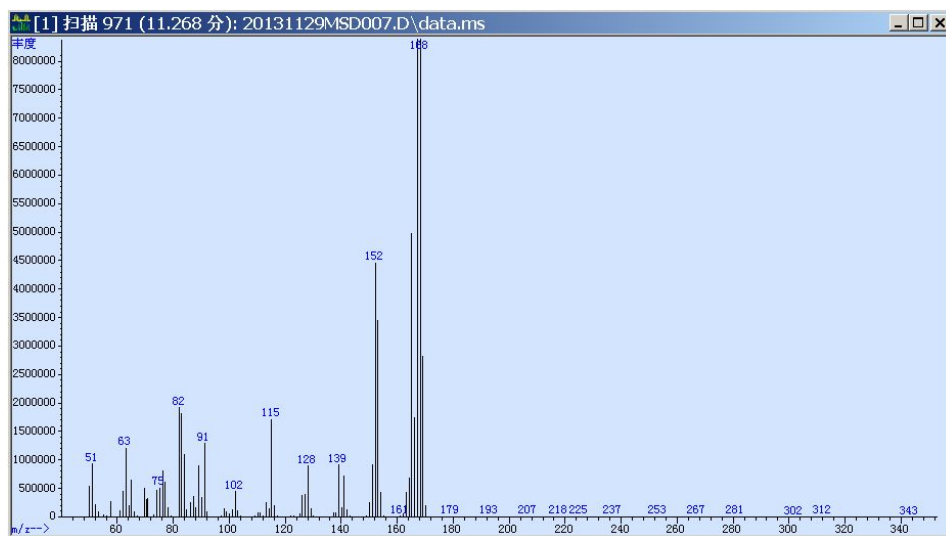

### 4-chlorobiphenyl 8c:

GC-MS (EI) [M]<sup>+</sup>: m/z calcd. for C<sub>12</sub>H<sub>9</sub>Cl: 188.0, found: 188.

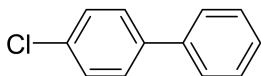



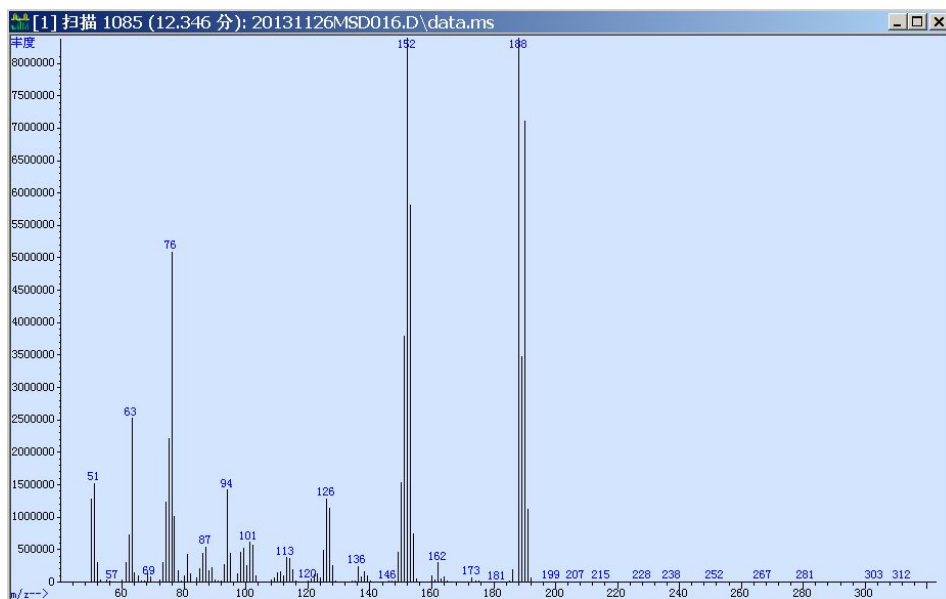

**biphenyl-4-ol 8d:**

GC-MS (EI) [M]<sup>+</sup>: m/z calcd. for C<sub>12</sub>H<sub>10</sub>O: 170.0, found: 170.

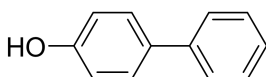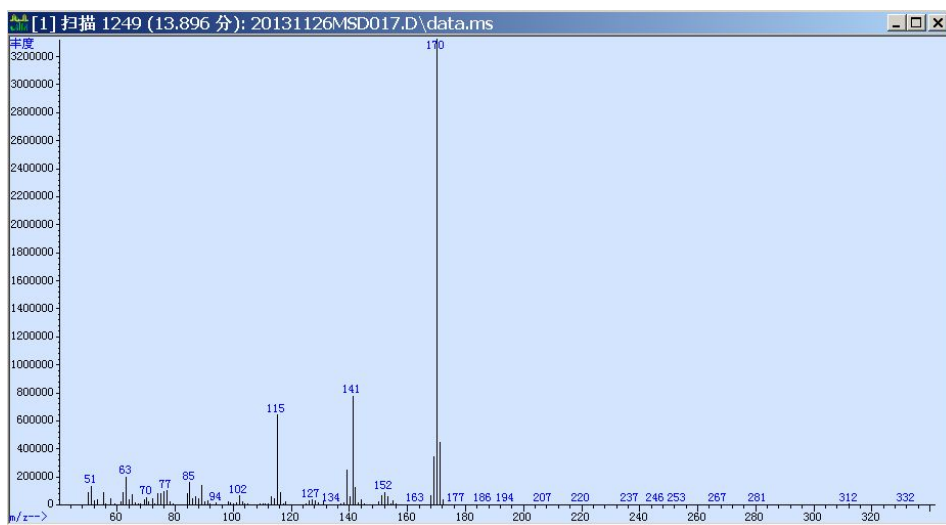

**4-nitrobiphenyl 8e:**

GC-MS (EI) [M]<sup>+</sup>: m/z calcd. for C<sub>12</sub>H<sub>9</sub>NO<sub>2</sub>: 199.0, found: 199.

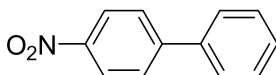

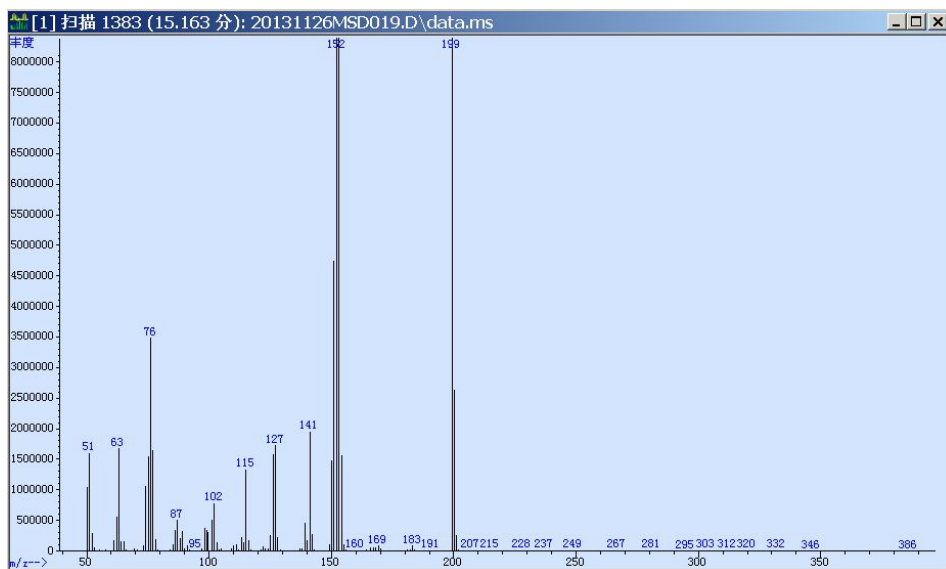

#### 4-(trifluoromethyl)biphenyl 8f:

GC-MS (EI) [M]<sup>+</sup>: m/z calcd. for C<sub>13</sub>H<sub>9</sub>F<sub>3</sub>: 222.0, found: 222.

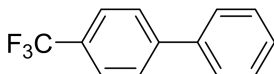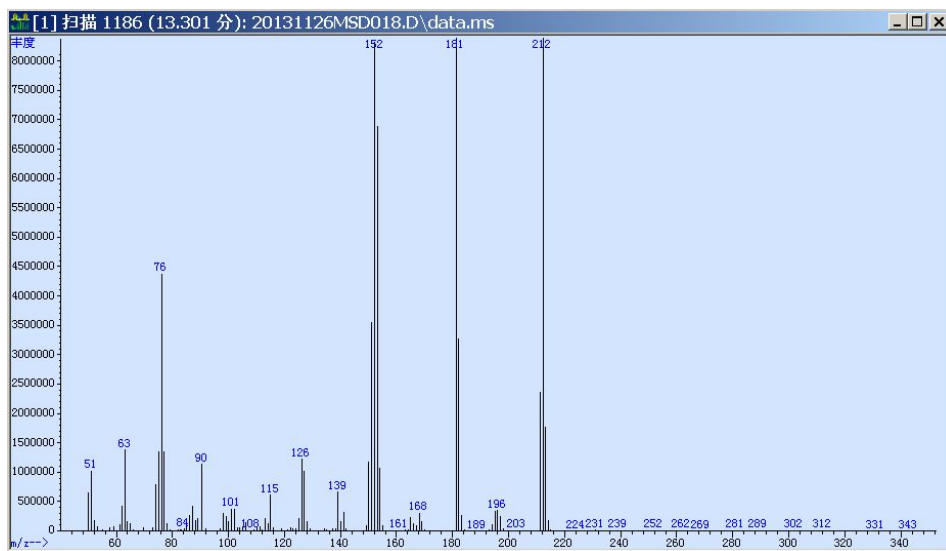

#### 3-nitrobiphenyl 8h:

GC-MS (EI) [M]<sup>+</sup>: m/z calcd. for C<sub>12</sub>H<sub>9</sub>NO<sub>2</sub>: 199.0, found: 199.

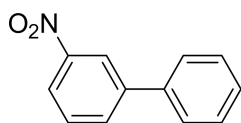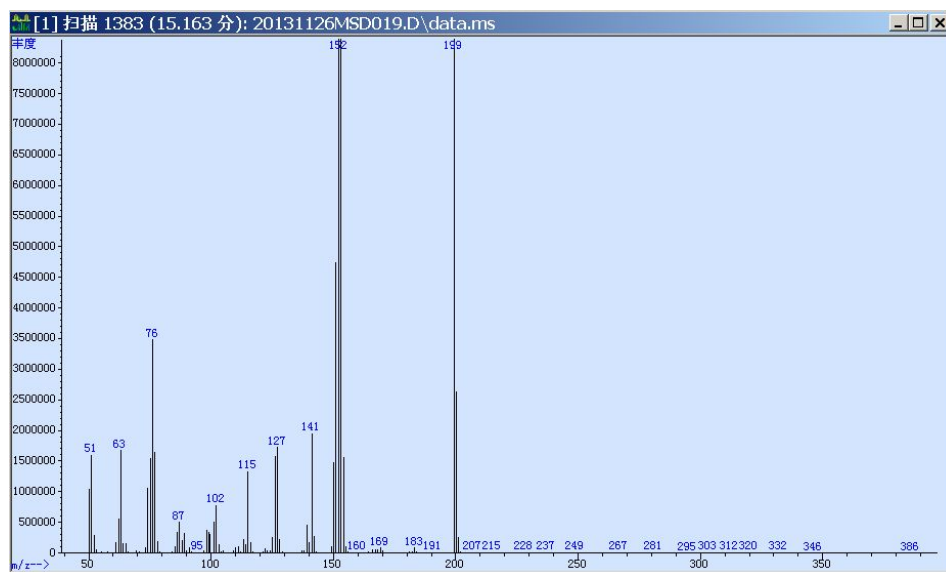

### 2-methylbiphenyl 8j:

GC-MS (EI) [M]<sup>+</sup>: m/z calcd. for C<sub>13</sub>H<sub>12</sub>: 168.0, found: 168.

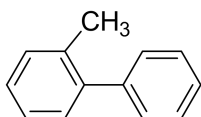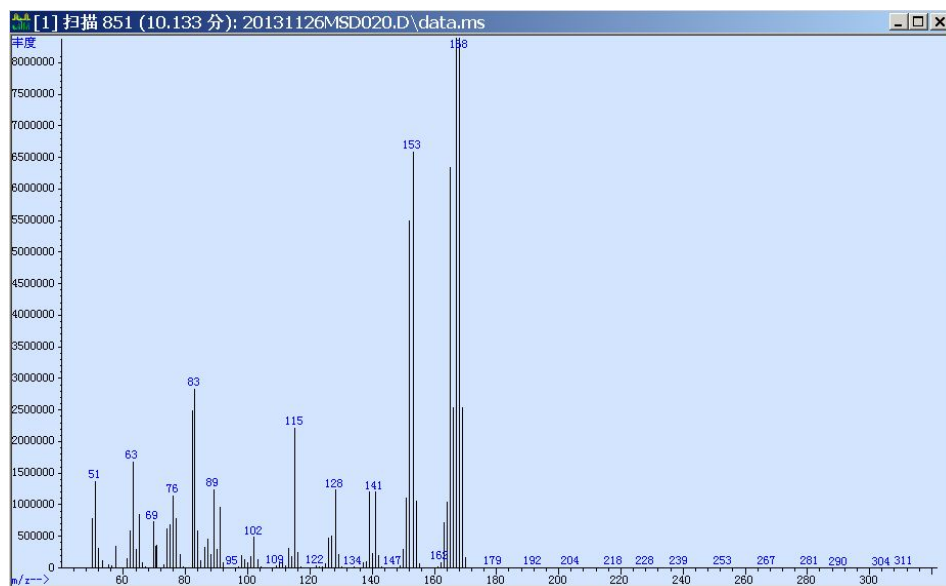

### 4-methoxy-4'-(trifluoromethoxy)biphenyl 8k:

GC-MS (EI) [M]<sup>+</sup>: m/z calcd. for C<sub>14</sub>H<sub>11</sub>F<sub>3</sub>O<sub>2</sub>: 268.0, found: 268.

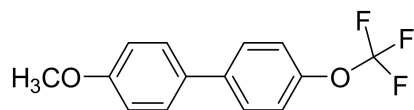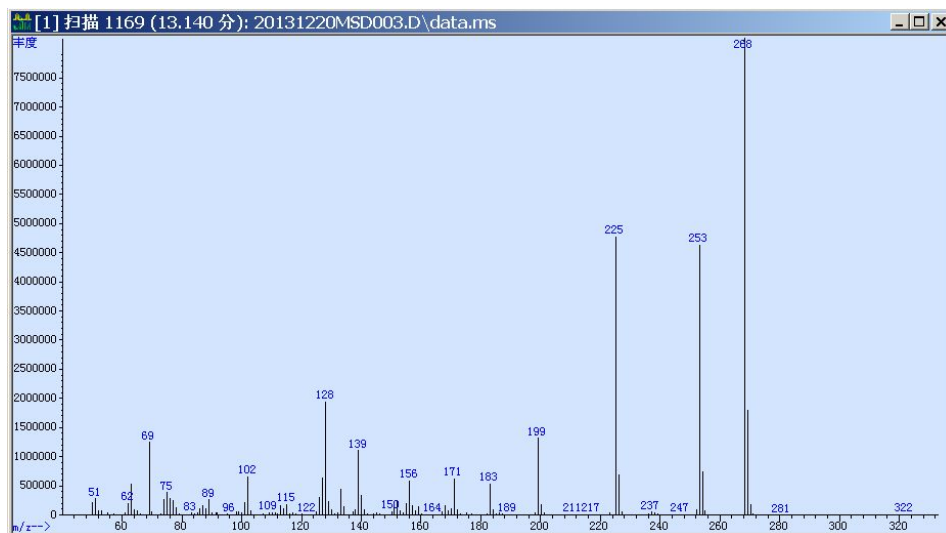

#### 4,4'-dimethoxybiphenyl 81:

GC-MS (EI) [M]<sup>+</sup>: m/z calcd. for C<sub>14</sub>H<sub>14</sub>O<sub>2</sub>: 214.0, found: 214.

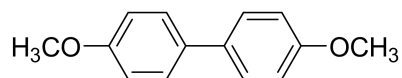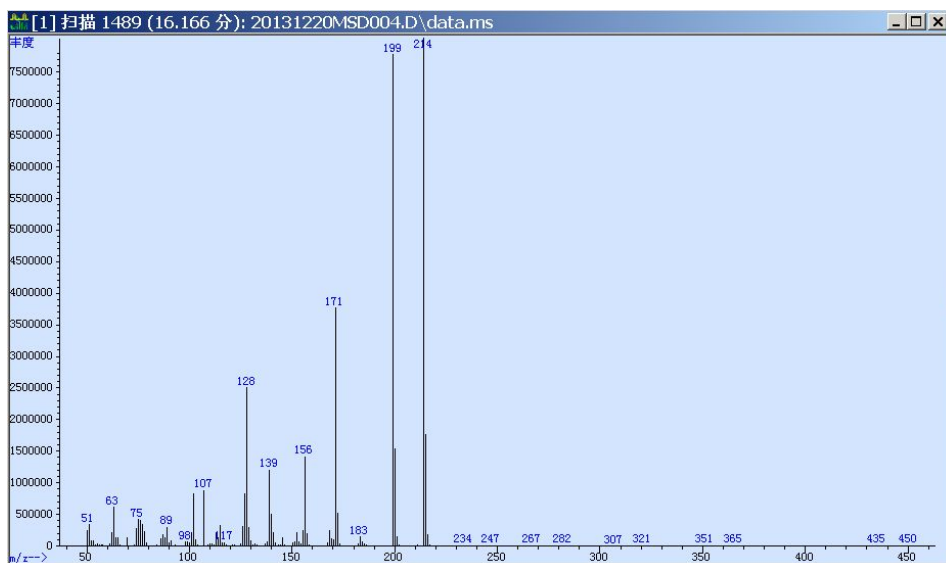

### 4-methoxy-4'-methylbiphenyl 8m:

GC-MS (EI) [M]<sup>+</sup>: m/z calcd. for C<sub>14</sub>H<sub>14</sub>O: 198.0, found: 198.

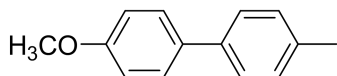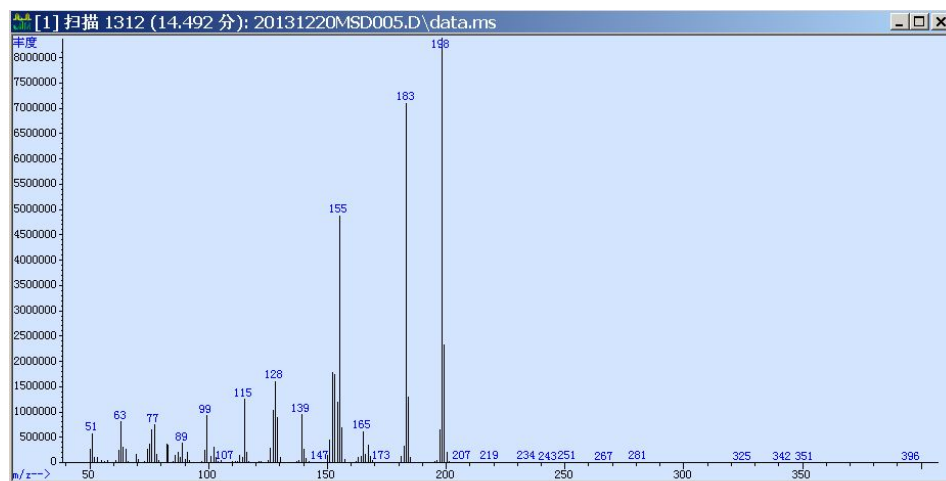

### 2,4'-dimethoxybiphenyl 8n:

GC-MS (EI) [M]<sup>+</sup>: m/z calcd. for C<sub>13</sub>H<sub>11</sub>FO: 202.0, found: 202.

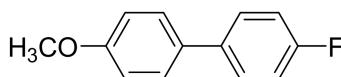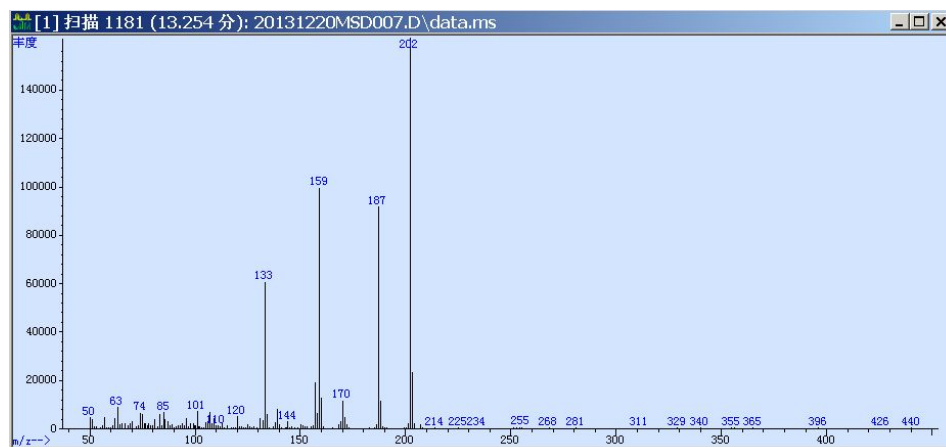

### (E)-1,2-diphenylethene 10a:

GC-MS (EI) [M]<sup>+</sup>: m/z calcd. for C<sub>14</sub>H<sub>12</sub>: 180.0, found: 180.

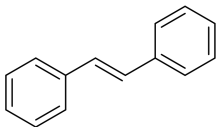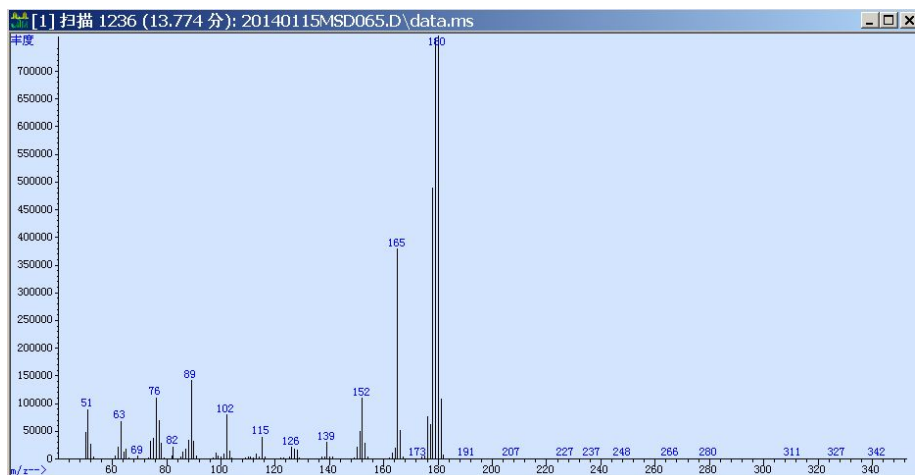

***E*-1-methyl-4-styrylbenzene 10b:**

GC-MS (EI) [M]<sup>+</sup>: m/z calcd. for C<sub>15</sub>H<sub>14</sub>: 194.0, found: 194.

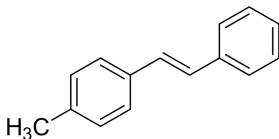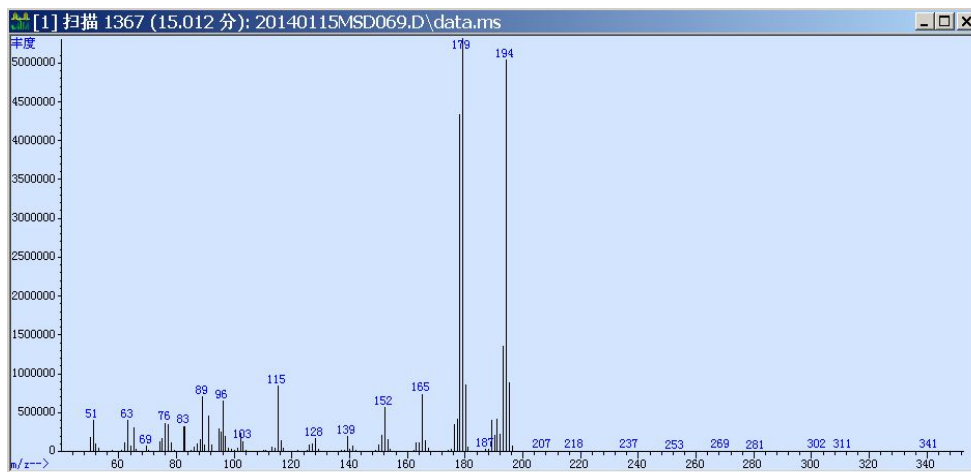

***E*-1-nitro-4-styrylbenzene 10c:**

GC-MS (EI) [M]<sup>+</sup>: m/z calcd. for C<sub>14</sub>H<sub>11</sub>NO<sub>2</sub>: 225.0, found: 225.

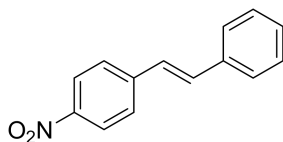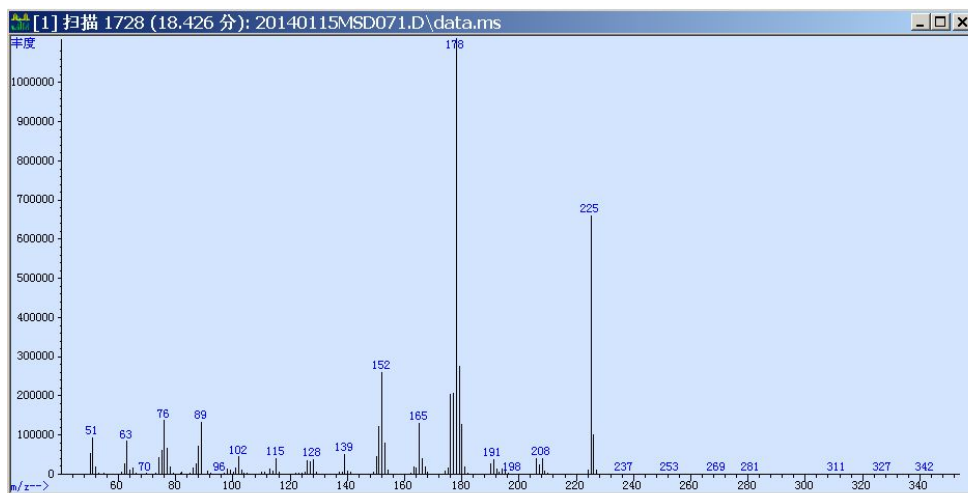

**(E)-1-chloro-4-styrylbenzene 10d:**

GC-MS (EI) [M]<sup>+</sup>: m/z calcd. for C<sub>14</sub>H<sub>11</sub>Cl: 214.0, found: 214.

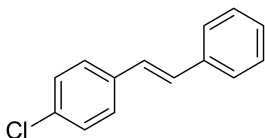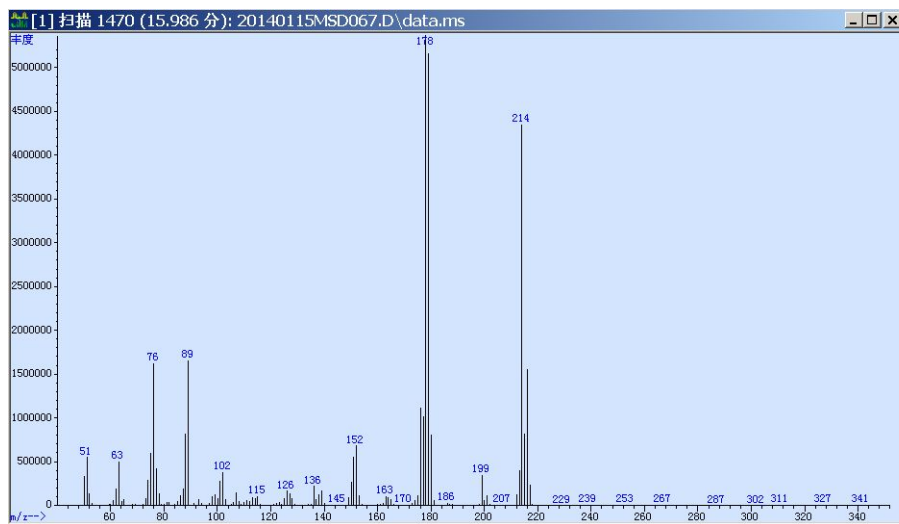

**(E)-1-methoxy-4-styrylbenzene 10f:**

GC-MS (EI) [M]<sup>+</sup>: m/z calcd. for C<sub>15</sub>H<sub>14</sub>O: 210.0, found: 210.

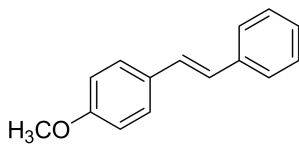

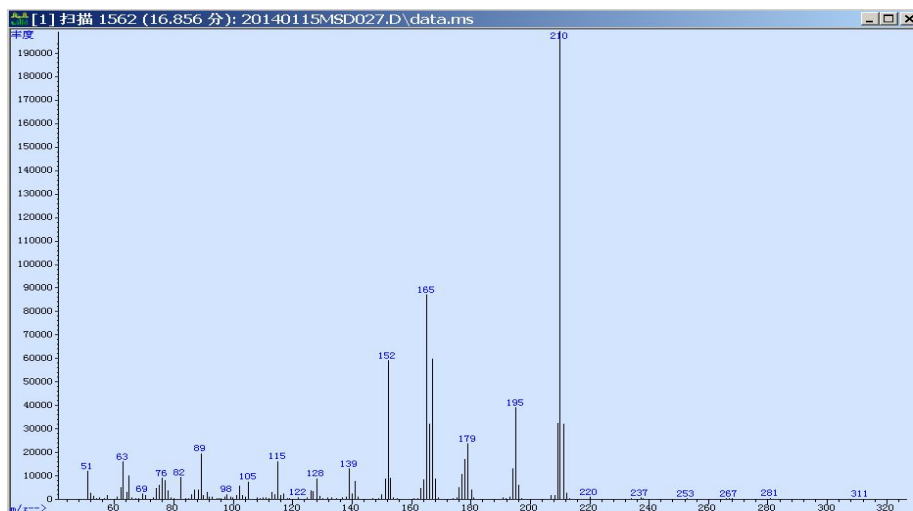

**Methyl cinnamate 10g:**

GC-MS (EI) [M]<sup>+</sup>: m/z calcd. for C<sub>10</sub>H<sub>10</sub>O<sub>2</sub>: 162.0, found: 162.

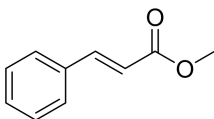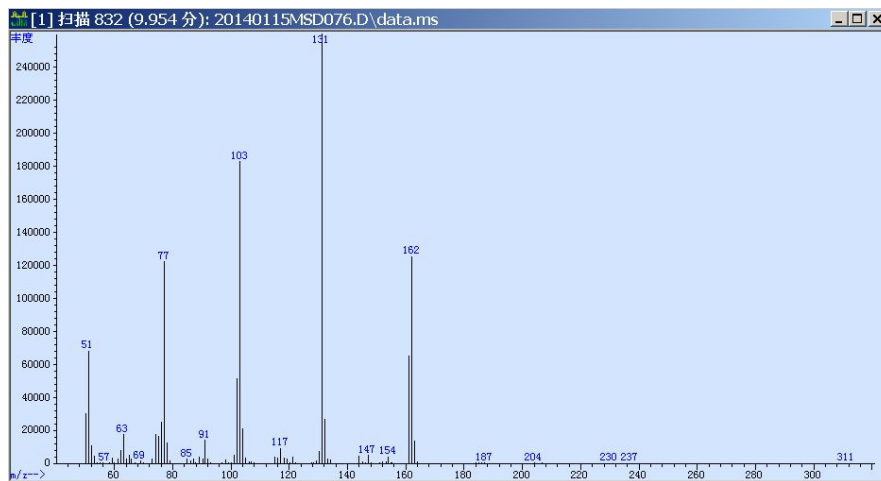



**The selected GC-analysis of products:**

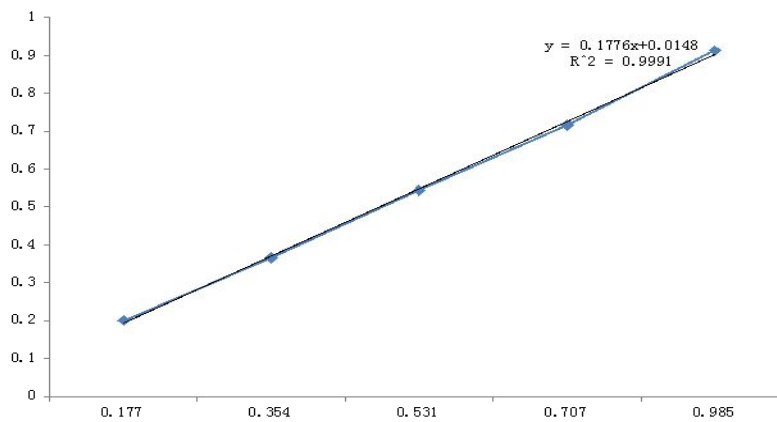

calibration curve

[General procedure: 分别将产物标准溶液稀释成20 mg/10 mL, 40 mg/10 mL, 60 mg/10 mL, 80 mg/10 mL, 100 mg/10mL 的梯度质量浓度, 取梯度质量浓度的产物标准溶液100  $\mu$ L于20 ml 试管中, 加入500  $\mu$ L 22.6 mg/10 mL 内标溶液,气相色谱测定以产物的峰面积与内标物的峰面积比( $A_{\text{产物}}/A_{\text{内标}}$ )为纵坐标Y, 其质量比( $M_{\text{产物}}/M_{\text{内标}}$ )为横坐标X, 绘制标准曲线。]

| NO.       | 1     | 2     | 3     | 4     | 5     | average |
|-----------|-------|-------|-------|-------|-------|---------|
| $S_{i/s}$ | 0.886 | 0.967 | 0.958 | 0.988 | 0.969 | 0.9536  |

response factor:  $S_{i/s} = S_i/S_s = A_i m_s / (A_s m_i)$

$$S_{i/s}=0.9536$$

relative quality correcting factor:  $f_{i/s} = f_i/f_s = m_i A_s / (m_s A_i)$

$$m_i = (A_i / A_s) * m_s * f_i / f_s = (A_i / A_s) * m_s / S_{i/s}$$

$$= 0.9469 * 184 / 0.9536$$

$$= 182.72$$

NO. 1:

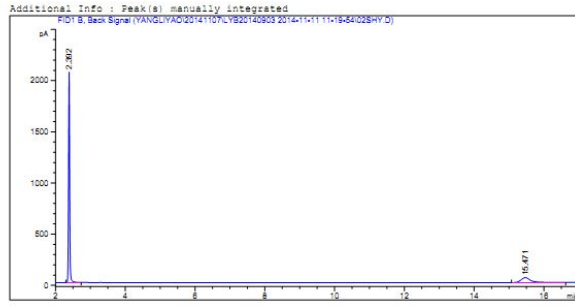

=====  
Area Percent Report  
=====

Sorted By : Signal  
Multiplier: : 1.0000  
Dilution: : 1.0000  
Use Multiplier & Dilution Factor with ISTDs

Signal 1: FID1 B, Back Signal

| Peak # | RetTime [min] | Type | Width [min] | Area [pA*s] | Height [pA] | Area %   |
|--------|---------------|------|-------------|-------------|-------------|----------|
| 1      | 2.392         | BV   | 0.0357      | 4718.49170  | 2063.63037  | 83.34396 |
| 2      | 15.471        | BB   | 0.2302      | 942.97632   | 48.63681    | 16.65604 |

NO. 2:

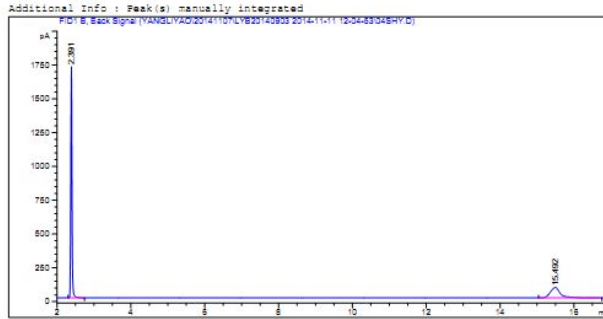

=====  
Area Percent Report  
=====

Sorted By : Signal  
Multiplier: : 1.0000  
Dilution: : 1.0000  
Use Multiplier & Dilution Factor with ISTDs

Signal 1: FID1 B, Back Signal

| Peak # | RetTime [min] | Type | Width [min] | Area [pA*s] | Height [pA] | Area %   |
|--------|---------------|------|-------------|-------------|-------------|----------|
| 1      | 2.391         | BV   | 0.0365      | 4036.02808  | 1711.79004  | 73.21147 |
| 2      | 15.492        | BB   | 0.2349      | 1476.80737  | 77.28842    | 26.78853 |

NO.3:

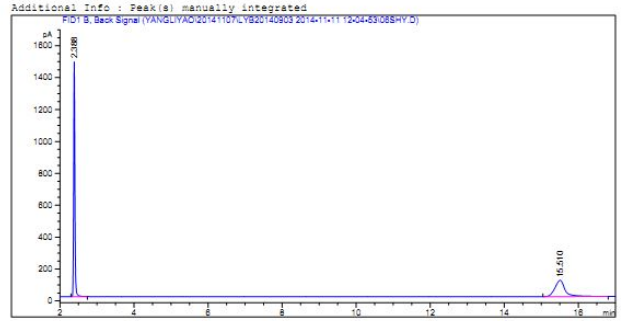

-----  
 Area Percent Report  
 -----

Sorted By : Signal  
 Multiplier: : 1.0000  
 Dilution: : 1.0000  
 Use Multiplier & Dilution Factor with ISTDs

Signal 1: FID1 B, Back Signal

| Peak # | RetTime [min] | Type | Width [min] | Area [pA*s] | Height [pA] | Area %   |
|--------|---------------|------|-------------|-------------|-------------|----------|
| 1      | 2.388         | BV   | 0.0365      | 3486.69653  | 1477.79114  | 64.34264 |
| 2      | 15.510        | BB   | 0.2333      | 1932.28537  | 102.77600   | 35.65736 |

NO.4:

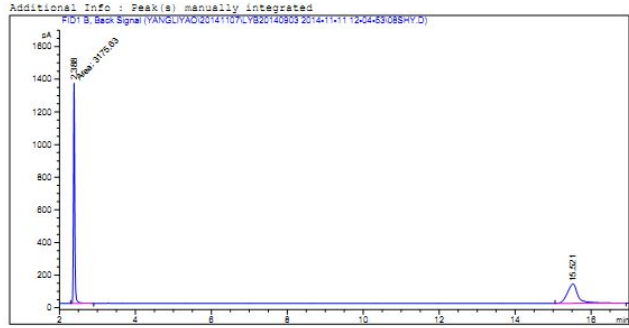

-----  
 Area Percent Report  
 -----

Sorted By : Signal  
 Multiplier: : 1.0000  
 Dilution: : 1.0000  
 Use Multiplier & Dilution Factor with ISTDs

Signal 1: FID1 B, Back Signal

| Peak # | RetTime [min] | Type | Width [min] | Area [pA*s] | Height [pA] | Area %   |
|--------|---------------|------|-------------|-------------|-------------|----------|
| 1      | 2.388         | MM   | 0.0391      | 3175.63428  | 1353.98901  | 58.27015 |
| 2      | 15.521        | BB   | 0.2599      | 2274.21358  | 117.95347   | 41.72985 |

NO.5:

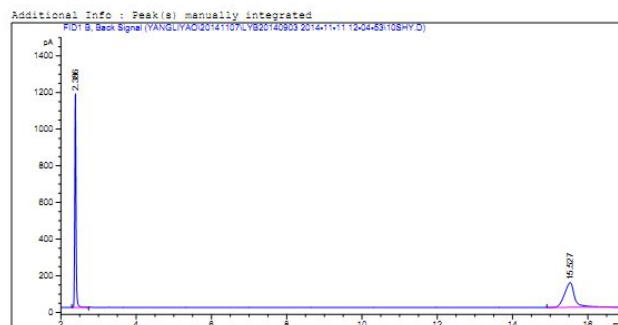

=====  
 Area Percent Report  
 =====

Sorted By : Signal  
 Multiplier: : 1.0000  
 Dilution: : 1.0000  
 Use Multiplier & Dilution Factor with ISTDs

Signal 1: FID1 B, Back Signal

| Peak # | RetTime [min] | Type | Width [min] | Area [pA*s] | Height [pA] | Area %   |
|--------|---------------|------|-------------|-------------|-------------|----------|
| 1      | 2.386         | BB   | 0.0367      | 2772.67261  | 1168.34900  | 52.28865 |
| 2      | 15.827        | BB   | 0.2300      | 2533.30371  | 134.84049   | 47.74435 |

Table 1, entry 5, 84% of GC yield:

Table 1, entry 6, 99% of GC yield:

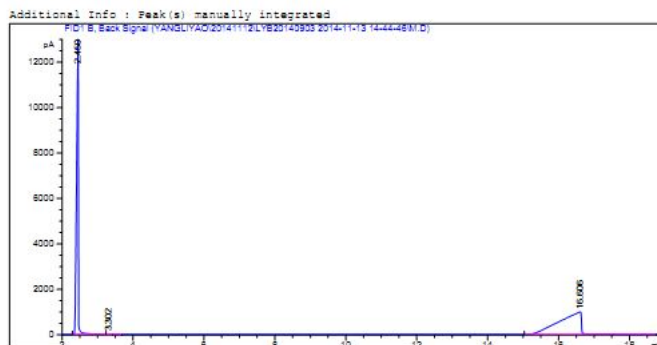

=====  
 Area Percent Report  
 =====

Sorted By : Signal  
 Multiplier: : 1.0000  
 Dilution: : 1.0000  
 Use Multiplier & Dilution Factor with ISTDs

Signal 1: FID1 B, Back Signal

| Peak # | RetTime [min] | Type | Width [min] | Area [pA*s] | Height [pA] | Area %   |
|--------|---------------|------|-------------|-------------|-------------|----------|
| 1      | 2.450         | VB S | 0.0469      | 4.51632e4   | 1.30826e4   | 51.34083 |
| 2      | 3.302         | BB X | 0.0502      | 35.78236    | 10.93300    | 0.04068  |
| 3      | 16.606        | BB   | 0.5242      | 4.27694e4   | 981.87457   | 48.61849 |

#### 4. X-ray Crystal Data for GPT-Pd catalyst **5c**

Crystals of GPT-Pd catalyst **5c** ( $C_{33}H_{48}Cl_2N_4O_9Pd$ ) were recrystallized from a acetonitrile-dichloromethane solution. A single white needle crystal which was suitable for X-ray diffraction measurements was mounted on a glass fiber. Unit cell measurements and intensity data collections were performed on a Rigaku AFC7R diffractometer with graphite monochromated Mo Ka. The data reduction included a correction for Lorentz and polarization effects, with an applied multi-scan absorption correction (SADABS). The crystal structure was solved and refined using the SHELXTL-97 program suite. Direct methods yielded all non-hydrogen atoms which were refined with anisotropic thermal parameters. The reflection data were consistent with a monoclinic system: P2(1)/c. The obtained crystal structure has been deposited at the Cambridge Crystallographic Data Centre and allocated the deposition number: 790566 (CCDC NO). The crystallographic data and refinement parameters of **5c** are listed in Table S1.

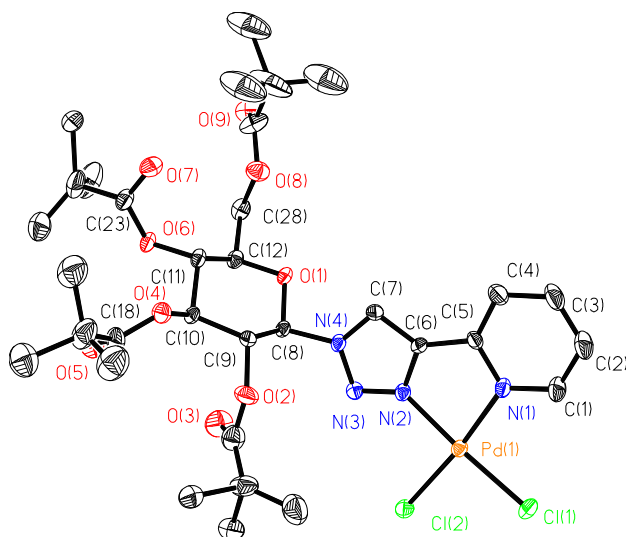

**Table S1.** Crystallographic data and structure refinement for **5c**.

|                                                |                                                                                               |
|------------------------------------------------|-----------------------------------------------------------------------------------------------|
| Identification code                            | 140414_cc2014_2_b                                                                             |
| Empirical formula                              | C <sub>66</sub> H <sub>9</sub> Cl <sub>4</sub> N <sub>8</sub> O <sub>18</sub> Pd <sub>2</sub> |
| Formula weight                                 | 1644.11                                                                                       |
| Temperature, K                                 | 293(2) K                                                                                      |
| Wavelength, Å                                  | 0.71073 Å                                                                                     |
| Crystal system                                 | Orthorhombic                                                                                  |
| Space group                                    | P212121                                                                                       |
| Cell dimensions                                |                                                                                               |
| <i>a</i> , <i>b</i> , <i>c</i> , Å             | 9.6866(3) Å, 11.4036(5) Å, 41.7046(15)Å                                                       |
| <i>α</i> , <i>β</i> , <i>γ</i> , °             | 90°, 90°, 90°                                                                                 |
| Volume, Å <sup>3</sup>                         | 4606.8(3) Å <sup>3</sup>                                                                      |
| <i>Z</i>                                       | 2                                                                                             |
| Calculated density, g/cm <sup>3</sup>          | 1.185                                                                                         |
| Absorption coefficient, mm <sup>-1</sup>       | 0.564                                                                                         |
| <i>F</i> (000)                                 | 1704                                                                                          |
| Crystal size, mm                               | 0.32 x 0.28 x 0.16 mm                                                                         |
| Theta range for data collection, °             | 3.03 to 25.01 deg                                                                             |
| Limiting indices                               | -10<= <i>h</i> <=11, -13<= <i>k</i> <=10, -47<= <i>l</i> <=49                                 |
| Completeness to theta = 25.01 °                | 99.7 %                                                                                        |
| Absorption correction                          | Semi-empirical from equivalents                                                               |
| Max. and min. transmission                     | 1.00000 and 0.91960                                                                           |
| Refinement method                              | Full-matrix least-squares on <i>F</i> <sup>2</sup>                                            |
| Data / restraints / parameters                 | 8108 / 64 / 465                                                                               |
| Goodness of fit on <i>F</i> <sup>2</sup>       | 1.140                                                                                         |
| R indices [ <i>I</i> > 2σ( <i>I</i> )]         | R1 = 0.0606, wR2 = 0.1644                                                                     |
| R indices (all data)                           | R1 = 0.0645, wR2 = 0.1676                                                                     |
| Absolute structure parameter                   | 0.02(5)                                                                                       |
| Largest diff. peak and hole, e Å <sup>-3</sup> | 0.782 and -0.827 e.Å <sup>-3</sup>                                                            |

## 6. References

1. a) C. Shen, H. Zheng, P. Zhang, X. Chen, *J. Carbohydr. Chem.* **2010**, *29*, 155-163; b) C. Shen, H. Xia, H. Yan, X. Chen, S. Ranjit, X. Xie, D. Tan, R. Lee, Y. Yang, B. Xing, K.-W. Huang, P. Zhang, X. Liu, *Chem. Sci.* **2012**, *3*, 2388-2393.
2. a) S. Santra, P. K. Hota, R. Bhattacharyya, P. Bera, P. Ghosh, S. K. Mandal, *ACS Catal.* **2013**, *3*, 2776-2789; b) W. Susanto, C.-Y. Chu, W. J. Ang, T.-C. Chou, L.-C. Lo, Y. Lam, *Green Chem.* **2012**, *14*, 77-80.
3. a) C. Liu, Y. Zhang, N. Liu, J. Qiu, *Green Chem.* **2012**, *14*, 2999-3003. 2999-3003; b) L. Liu, Y. Dong, N. Tang, *Green Chem.* **2014**, *16*, 2185-2189; c) Q. Zhang, H. Su, J. Luo, Y. Wei, *Catal. Sci. Technol.* **2013**, *3*, 235-243.
4. a) M. Gopiraman, R. Karvembu, I. S. Kim, *ACS Catal.* **2014**, *4* (7), 2118-2129; b) F. Chen, M. Huang, Y. Li, *Ind. Eng. Chem. Res.* **2014**, *53* (20), 8339-8345.
5. a) M. Planellas, Y. Moglie, F. Alonso, M. Yus, R. Pleixats, A. Shafir, *Eur. J. Org. Chem.* **2014**, *2014*, 3001-3008; b) A. Modak, J. Mondal, A. Bhaumik, *Green Chem.* **2012**, *14* (10), 2840-2855.
6. Q. Wang, E. Lucien, A. Hashimoto, G. C. G. Pais, D. M. Nelson, Y. Song, J. A. Thanassi, C. W. Marlor, C. L. Thoma, J. Cheng, S. D. Podos, Y. Ou, M. Deshpande, M. J. Pucci, D. D. Buechter, B. J. Bradbury, J. A. Wiles, *J. Med. Chem.* **2007**, *50*, 199-210.
7. R. H. Crabtree, *Chem Rev.* **2012**, *112*, 1536-1554..
